# Supplementary material
Source: publisher figshare collection journal article supplement (https://acs.figshare.com/ndownloader/files/5673396)
Supplement: Supplementary file 1 [file 5673396]

## Sheet: GO BP OverRepresented FTA
		Gene ontology Biological Process statistical over-representation against the human database. A statistical correction of the p-value, based on the False Discovery Rate (FDR<5%), was performed in Protein Center, for the follicular thyroid adenoma (FTA) differentially abundant proteins
		Description	FDR p-value
		2'-deoxyribonucleotide biosynthetic process	0.0197
		2-oxoglutarate metabolic process	0.000144
		acetyl-CoA biosynthetic process	0.00199
		acetyl-CoA biosynthetic process from pyruvate	0.00145
		acetyl-CoA metabolic process	0.00992
		acidic amino acid transport	0.0197
		actin cytoskeleton organization	5.8e-09
		actin filament bundle assembly	0.0135
		actin filament bundle organization	0.0197
		actin filament capping	8.64e-05
		actin filament depolymerization	6.23e-07
		actin filament organization	7.35e-08
		actin filament polymerization	6.7e-05
		actin filament severing	0.00197
		actin filament-based movement	0.00203
		actin filament-based process	3.96e-10
		actin nucleation	0.000161
		actin polymerization or depolymerization	1.49e-05
		actin-mediated cell contraction	0.016
		actin-myosin filament sliding	0.00209
		activation of immune response	2.8e-11
		activation of innate immune response	0.00024
		activation of MAPKK activity	0.000904
		activation of membrane attack complex	0.0255
		actomyosin structure organization	0.00791
		acute inflammatory response	3.83e-05
		acute-phase response	0.00324
		acyl-CoA biosynthetic process	0.00109
		acyl-CoA metabolic process	3.83e-05
		acylglycerol catabolic process	0.000725
		acylglycerol metabolic process	0.000613
		adenine transport	0.000162
		adherens junction assembly	0.0489
		adherens junction organization	0.026
		ADP biosynthetic process	0.0105
		ADP metabolic process	4.18e-05
		aerobic respiration	3.03e-16
		aging	0.000151
		alcohol metabolic process	0.000853
		aldehyde biosynthetic process	0.0375
		aldehyde catabolic process	0.017
		alditol metabolic process	0.0255
		alpha-amino acid catabolic process	5.62e-08
		alpha-amino acid metabolic process	2.35e-32
		ameboidal-type cell migration	0.044
		amide biosynthetic process	1.28e-34
		amine metabolic process	8.96e-11
		amino acid activation	5.98e-06
		amino-acid betaine biosynthetic process	0.0209
		aminoglycan biosynthetic process	0.0426
		aminoglycan catabolic process	0.000159
		aminoglycan metabolic process	0.0217
		anaphase-promoting complex-dependent proteasomal ubiquitin-dependent protein catabolic process	3.96e-09
		anatomical structure development	1.08e-08
		anatomical structure homeostasis	4.61e-08
		anatomical structure morphogenesis	7.47e-07
		angiogenesis	0.0141
		angiotensin maturation	0.00524
		animal organ development	3.25e-06
		antigen processing and presentation	1.82e-11
		antigen processing and presentation of exogenous antigen	2.26e-11
		antigen processing and presentation of exogenous peptide antigen	1.31e-11
		antigen processing and presentation of exogenous peptide antigen via MHC class I	1.46e-09
		antigen processing and presentation of exogenous peptide antigen via MHC class I, TAP-dependent	6.81e-10
		antigen processing and presentation of exogenous peptide antigen via MHC class II	0.00103
		antigen processing and presentation of peptide antigen	7.02e-12
		antigen processing and presentation of peptide antigen via MHC class I	5.45e-12
		antigen processing and presentation of peptide antigen via MHC class II	0.00199
		antigen processing and presentation of peptide or polysaccharide antigen via MHC class II	0.000884
		antigen receptor-mediated signaling pathway	1.18e-08
		apolipoprotein A-I-mediated signaling pathway	0.0087
		apoptotic cell clearance	0.000165
		apoptotic DNA fragmentation	0.0241
		apoptotic mitochondrial changes	0.00913
		apoptotic nuclear changes	0.0168
		apoptotic process	2.77e-08
		apoptotic signaling pathway	0.00769
		arginine catabolic process	0.0197
		arginine metabolic process	0.0235
		aromatic compound catabolic process	1.34e-23
		Arp2/3 complex-mediated actin nucleation	0.00104
		aspartate family amino acid catabolic process	0.0255
		aspartate family amino acid metabolic process	0.0106
		ATP biosynthetic process	8.56e-07
		ATP generation from ADP	0.000487
		ATP metabolic process	9.4e-24
		ATP synthesis coupled electron transport	6.79e-14
		ATP synthesis coupled proton transport	1.28e-06
		autophagy	0.00327
		axon development	5.5e-07
		axon guidance	1.55e-05
		axonogenesis	1.78e-06
		B cell mediated immunity	0.00204
		B cell receptor signaling pathway	0.0175
		barbed-end actin filament capping	0.00195
		beta-amyloid clearance	0.0105
		binding of sperm to zona pellucida	0.0334
		biological adhesion	6.87e-05
		biological regulation	2.81e-06
		biological_process	1.38e-44
		bioluminescence	1.61e-05
		biosynthetic process	1.76e-16
		blood coagulation	3.8e-12
		blood coagulation, fibrin clot formation	1.82e-07
		blood coagulation, intrinsic pathway	1.49e-05
		blood vessel development	0.0269
		blood vessel morphogenesis	0.0385
		branched-chain amino acid catabolic process	1.76e-08
		branched-chain amino acid metabolic process	8.57e-08
		canonical glycolysis	9.64e-06
		canonical Wnt signaling pathway	0.0249
		cap-independent translational initiation	0.0025
		carbohydrate biosynthetic process	2.7e-09
		carbohydrate catabolic process	1.85e-08
		carbohydrate derivative biosynthetic process	1e-08
		carbohydrate derivative catabolic process	0.000376
		carbohydrate derivative metabolic process	2.28e-22
		carbohydrate metabolic process	3.39e-17
		carboxylic acid biosynthetic process	0.000697
		carboxylic acid catabolic process	4.1e-15
		carboxylic acid metabolic process	4.58e-62
		cardiac muscle cell action potential	0.029
		cardiovascular system development	0.0294
		cartilage development involved in endochondral bone morphogenesis	0.0424
		catabolic process	4.15e-60
		cation homeostasis	0.0432
		cell activation	2.33e-05
		cell adhesion	0.000156
		cell adhesion molecule production	0.0424
		cell cycle arrest	0.000309
		cell cycle checkpoint	0.0109
		cell cycle G1/S phase transition	0.00387
		cell cycle phase transition	0.00145
		cell death	1.16e-08
		cell death in response to oxidative stress	0.00126
		cell development	2.96e-05
		cell differentiation	5.94e-05
		cell growth	0.0397
		cell growth involved in cardiac muscle cell development	0.0453
		cell junction assembly	1.96e-06
		cell junction organization	2.1e-05
		cell migration	4.27e-05
		cell morphogenesis	1.12e-05
		cell morphogenesis involved in differentiation	2.4e-07
		cell morphogenesis involved in neuron differentiation	1.4e-05
		cell motility	0.000207
		cell part morphogenesis	0.000106
		cell projection morphogenesis	0.000335
		cell projection organization	6.37e-05
		cell recognition	0.00349
		cell redox homeostasis	4.72e-07
		cell-cell junction assembly	0.00481
		cell-cell junction organization	0.0057
		cell-matrix adhesion	0.000901
		cell-substrate adhesion	1.69e-06
		cell-substrate junction assembly	0.00471
		cellular aldehyde metabolic process	1.24e-14
		cellular amide metabolic process	5.55e-44
		cellular amine metabolic process	5.03e-11
		cellular amino acid catabolic process	1.7e-10
		cellular amino acid metabolic process	6.81e-50
		cellular aromatic compound metabolic process	1.4e-07
		cellular biogenic amine metabolic process	7.58e-10
		cellular biosynthetic process	2.02e-12
		cellular carbohydrate biosynthetic process	0.00169
		cellular carbohydrate catabolic process	0.0207
		cellular carbohydrate metabolic process	0.0144
		cellular catabolic process	3.19e-49
		cellular cation homeostasis	0.0356
		cellular chemical homeostasis	0.033
		cellular component assembly	4.95e-22
		cellular component biogenesis	1.38e-30
		cellular component disassembly	1.28e-43
		cellular component disassembly involved in execution phase of apoptosis	4.18e-05
		cellular component morphogenesis	1.82e-06
		cellular component organization	1.73e-47
		cellular component organization or biogenesis	1.3e-47
		cellular detoxification	6.8e-22
		cellular developmental process	7.34e-05
		cellular glucan metabolic process	0.0338
		cellular heat acclimation	0.0426
		cellular homeostasis	0.000152
		cellular hormone metabolic process	0.011
		cellular ion homeostasis	0.0195
		cellular iron ion homeostasis	0.0335
		cellular ketone body metabolic process	0.012
		cellular ketone metabolic process	5.65e-11
		cellular lipid catabolic process	8.23e-08
		cellular lipid metabolic process	4.3e-06
		cellular localization	4.07e-27
		cellular macromolecular complex assembly	8.64e-21
		cellular macromolecule biosynthetic process	0.000921
		cellular macromolecule catabolic process	2.17e-22
		cellular macromolecule localization	1.77e-25
		cellular macromolecule metabolic process	8.21e-08
		cellular metabolic compound salvage	0.0376
		cellular metabolic process	2.28e-40
		cellular metal ion homeostasis	0.0434
		cellular modified amino acid metabolic process	1.51e-35
		cellular nitrogen compound biosynthetic process	0.00374
		cellular nitrogen compound catabolic process	1.29e-21
		cellular nitrogen compound metabolic process	4.87e-22
		cellular oxidant detoxification	1.18e-20
		cellular polysaccharide catabolic process	0.00333
		cellular polysaccharide metabolic process	0.0433
		cellular process	5.31e-40
		cellular protein catabolic process	4.32e-05
		cellular protein complex assembly	2.15e-10
		cellular protein complex disassembly	2.13e-28
		cellular protein localization	7.56e-26
		cellular protein metabolic process	1.49e-22
		cellular respiration	6.46e-27
		cellular response to amino acid stimulus	0.0376
		cellular response to chemical stimulus	5.61e-15
		cellular response to cytokine stimulus	0.00176
		cellular response to DNA damage stimulus	0.00583
		cellular response to endogenous stimulus	3.94e-05
		cellular response to fibroblast growth factor stimulus	8.82e-05
		cellular response to growth factor stimulus	0.000853
		cellular response to heat	0.0194
		cellular response to hormone stimulus	0.00101
		cellular response to indole-3-methanol	0.00796
		cellular response to inorganic substance	0.0128
		cellular response to insulin stimulus	0.000242
		cellular response to lipoprotein particle stimulus	0.0255
		cellular response to low-density lipoprotein particle stimulus	0.0143
		cellular response to metal ion	0.0386
		cellular response to nitrogen compound	0.000201
		cellular response to organic substance	2.92e-06
		cellular response to organonitrogen compound	0.000434
		cellular response to oxidative stress	1.34e-06
		cellular response to oxygen radical	4.5e-06
		cellular response to oxygen-containing compound	1.41e-05
		cellular response to peptide	0.000166
		cellular response to peptide hormone stimulus	0.000146
		cellular response to reactive oxygen species	5.86e-05
		cellular response to stimulus	1.03e-05
		cellular response to stress	1.03e-10
		cellular response to superoxide	4.5e-06
		cellular response to topologically incorrect protein	0.00115
		cellular response to tumor necrosis factor	0.000403
		cellular response to unfolded protein	0.000423
		cellular response to xenobiotic stimulus	3.84e-05
		cellular transition metal ion homeostasis	0.017
		chaperone-mediated autophagy	0.01
		chaperone-mediated protein complex assembly	0.00798
		chaperone-mediated protein folding	5.23e-06
		chaperone-mediated protein transport	0.0424
		chemical homeostasis	0.0107
		chemotaxis	5.02e-07
		cholesterol biosynthetic process	0.0399
		cholesterol efflux	0.0095
		cholesterol esterification	0.00153
		cholesterol import	0.0255
		cholesterol transport	0.0125
		chondroitin sulfate catabolic process	0.0165
		chromatin assembly	0.0179
		chromatin assembly or disassembly	0.0428
		circulatory system development	0.0294
		cis assembly of pre-catalytic spliceosome	0.0426
		citrate metabolic process	6.21e-13
		coagulation	6.69e-12
		coenzyme biosynthetic process	0.00017
		coenzyme metabolic process	3.71e-15
		cofactor biosynthetic process	1.05e-05
		cofactor metabolic process	6.24e-19
		collagen catabolic process	1.15e-07
		collagen fibril organization	0.000103
		collagen metabolic process	3.36e-07
		complement activation	7.86e-09
		complement activation, alternative pathway	0.00153
		complement activation, classical pathway	0.000108
		COPI coating of Golgi vesicle	2.03e-05
		COPI-coated vesicle budding	2.03e-05
		COPII vesicle coating	0.000721
		COPII-coated vesicle budding	4.82e-05
		copper ion transport	0.00372
		cortical actin cytoskeleton organization	0.0182
		cortical cytoskeleton organization	0.0166
		cotranslational protein targeting to membrane	1.88e-42
		creatine metabolic process	0.0295
		cuticle development	0.0426
		cytokine-mediated signaling pathway	0.0196
		cytolysis	0.0462
		cytolysis by symbiont of host cells	0.0135
		cytolysis in other organism	0.0135
		cytolysis in other organism involved in symbiotic interaction	0.0135
		cytoplasmic sequestering of protein	0.0399
		cytoplasmic translation	2.23e-07
		cytoplasmic translational initiation	0.00798
		cytoskeletal anchoring at plasma membrane	0.0197
		cytoskeleton organization	1.88e-09
		cytosolic transport	0.0422
		'de novo' posttranslational protein folding	3.3e-08
		'de novo' protein folding	3.1e-09
		defense response	1.85e-07
		defense response to bacterium	0.0215
		deoxyribose phosphate biosynthetic process	0.0197
		dermatan sulfate biosynthetic process	0.012
		dermatan sulfate metabolic process	0.017
		dermatan sulfate proteoglycan biosynthetic process	0.0293
		dermatan sulfate proteoglycan metabolic process	0.0375
		detoxification	4.42e-22
		detoxification of nitrogen compound	0.0337
		developmental process	5.86e-11
		diadenosine polyphosphate biosynthetic process	0.0255
		diadenosine polyphosphate metabolic process	0.0426
		diadenosine tetraphosphate biosynthetic process	0.0255
		diadenosine tetraphosphate metabolic process	0.0255
		dicarboxylic acid metabolic process	2.94e-05
		disaccharide biosynthetic process	0.0426
		disaccharide metabolic process	0.0424
		disruption by host of symbiont cells	0.0424
		disruption of cells of other organism involved in symbiotic interaction	0.0209
		diterpenoid metabolic process	1.36e-07
		DNA catabolic process, endonucleolytic	0.0489
		DNA conformation change	0.00031
		DNA damage checkpoint	0.000152
		DNA damage response, signal transduction by p53 class mediator	5.61e-06
		DNA damage response, signal transduction by p53 class mediator resulting in cell cycle arrest	3.65e-09
		DNA duplex unwinding	0.0059
		DNA geometric change	0.00136
		DNA integrity checkpoint	8.88e-05
		DNA ligation	0.0162
		DNA ligation involved in DNA repair	0.00153
		DNA metabolic process	0.0143
		DNA packaging	0.00927
		DNA replication	0.00793
		DNA-templated transcription, termination	0.00076
		dopamine catabolic process	0.0196
		dopamine metabolic process	0.0285
		double-strand break repair via nonhomologous end joining	0.0416
		D-ribose catabolic process	0.0255
		D-ribose metabolic process	0.0255
		early endosome to recycling endosome transport	0.0426
		elastic fiber assembly	0.00162
		electron transport chain	2.09e-19
		embryo implantation	0.0339
		endocytosis	1.75e-13
		endoderm development	0.0335
		endoderm formation	0.017
		endodermal cell differentiation	0.00528
		endomembrane system organization	9.32e-06
		endonucleolytic cleavage to generate mature 3'-end of SSU-rRNA from (SSU-rRNA, 5.8S rRNA, LSU-rRNA)	0.0106
		endoplasmic reticulum organization	0.0113
		endoplasmic reticulum tubular network assembly	0.0255
		endoplasmic reticulum unfolded protein response	0.000235
		endosomal transport	0.0365
		endothelial cell development	0.0287
		endothelial cell proliferation	0.0378
		energy coupled proton transport, down electrochemical gradient	1.28e-06
		energy derivation by oxidation of organic compounds	5.31e-25
		energy reserve metabolic process	0.00642
		entry into cell of other organism involved in symbiotic interaction	0.0099
		entry into host	0.0099
		entry into host cell	0.0099
		entry into other organism involved in symbiotic interaction	0.0099
		enzyme linked receptor protein signaling pathway	0.00166
		ephrin receptor signaling pathway	0.00293
		epidermal growth factor receptor signaling pathway	0.00256
		epidermis development	0.0468
		epithelial cell differentiation	0.0244
		epithelium development	8.44e-06
		epithelium migration	0.0398
		ER to Golgi vesicle-mediated transport	2.2e-13
		ER-associated ubiquitin-dependent protein catabolic process	0.00516
		ERBB signaling pathway	0.000445
		erythrose 4-phosphate/phosphoenolpyruvate family amino acid catabolic process	0.0348
		erythrose 4-phosphate/phosphoenolpyruvate family amino acid metabolic process	0.00818
		ESCRT complex disassembly	0.0337
		ESCRT III complex disassembly	0.0337
		establishment of apical/basal cell polarity	0.012
		establishment of cell polarity	0.0108
		establishment of endothelial intestinal barrier	0.0165
		establishment of epithelial cell apical/basal polarity	0.0295
		establishment of Golgi localization	8.88e-05
		establishment of integrated proviral latency	0.00309
		establishment of localization	1.42e-38
		establishment of localization in cell	2.48e-26
		establishment of monopolar cell polarity	0.00475
		establishment of organelle localization	0.000746
		establishment of planar polarity	1.8e-13
		establishment of protein localization	4.8e-21
		establishment of protein localization to chromatin	0.00401
		establishment of protein localization to chromosome	1.87e-05
		establishment of protein localization to endoplasmic reticulum	4.24e-44
		establishment of protein localization to membrane	1.26e-25
		establishment of protein localization to mitochondrial membrane	0.0135
		establishment of protein localization to mitochondrion	0.0226
		establishment of protein localization to organelle	7.16e-22
		establishment of protein localization to plasma membrane	0.0273
		establishment of protein localization to telomere	0.00177
		establishment of RNA localization	2.47e-06
		establishment of tissue polarity	6.21e-13
		establishment of vesicle localization	0.0174
		establishment of viral latency	0.0143
		establishment or maintenance of cell polarity	0.00375
		establishment or maintenance of monopolar cell polarity	0.0057
		ethanol metabolic process	0.000336
		ethanol oxidation	0.000132
		eukaryotic translation initiation factor 4F complex assembly	0.0106
		evasion or tolerance of defense response of other organism involved in symbiotic interaction	0.0255
		evasion or tolerance of host defense response	0.0255
		execution phase of apoptosis	0.00155
		exocytosis	9.03e-10
		extracellular fibril organization	1.21e-05
		extracellular matrix disassembly	2.64e-15
		extracellular matrix organization	3.41e-26
		extracellular structure organization	4.64e-26
		fat-soluble vitamin metabolic process	0.00011
		fatty acid beta-oxidation	6.66e-06
		fatty acid beta-oxidation using acyl-CoA dehydrogenase	0.00892
		fatty acid catabolic process	8.9e-05
		fatty acid metabolic process	0.000269
		fatty acid oxidation	0.000104
		Fc receptor mediated stimulatory signaling pathway	1.35e-05
		Fc receptor signaling pathway	3.17e-06
		Fc-epsilon receptor signaling pathway	0.00289
		Fc-gamma receptor signaling pathway	8.41e-06
		Fc-gamma receptor signaling pathway involved in phagocytosis	6.3e-06
		fibril organization	8.93e-09
		fibrinolysis	3.35e-07
		fibroblast growth factor receptor signaling pathway	0.000151
		formaldehyde catabolic process	0.0106
		formaldehyde metabolic process	0.00496
		formation of translation preinitiation complex	0.000819
		fructose 6-phosphate metabolic process	0.0135
		fructose biosynthetic process	0.0255
		fructose metabolic process	0.00675
		fumarate metabolic process	0.0087
		G1 DNA damage checkpoint	1.19e-07
		G1/S transition of mitotic cell cycle	0.00362
		galactose catabolic process	0.017
		gamma-aminobutyric acid catabolic process	0.0255
		gamma-aminobutyric acid metabolic process	0.0255
		gas transport	0.00312
		gene expression	1.47e-07
		generation of neurons	0.00251
		generation of precursor metabolites and energy	6.37e-29
		glial cell migration	0.00924
		glomerular epithelium development	0.0348
		glucan catabolic process	0.00333
		glucan metabolic process	0.0338
		gluconeogenesis	2.09e-05
		glucose 6-phosphate metabolic process	0.000173
		glucose catabolic process	6.35e-05
		glucose catabolic process to pyruvate	9.64e-06
		glucose metabolic process	4.27e-08
		glucuronate catabolic process	0.0255
		glucuronate catabolic process to xylulose 5-phosphate	0.0196
		glutamate catabolic process to aspartate	0.0426
		glutamine family amino acid catabolic process	0.0121
		glutathione derivative biosynthetic process	7.93e-06
		glutathione derivative metabolic process	7.93e-06
		glutathione metabolic process	2.23e-06
		glyceraldehyde-3-phosphate metabolic process	1.41e-05
		glycerolipid catabolic process	0.00859
		glycogen catabolic process	0.00293
		glycogen metabolic process	0.0327
		glycolytic process	0.000361
		glycolytic process through fructose-6-phosphate	1.17e-05
		glycolytic process through glucose-6-phosphate	1.17e-05
		glycoprotein biosynthetic process	1.28e-05
		glycoprotein metabolic process	8.76e-06
		glycosaminoglycan biosynthetic process	0.0422
		glycosaminoglycan catabolic process	0.000131
		glycosaminoglycan metabolic process	0.0215
		glycoside catabolic process	0.00579
		glycoside metabolic process	0.00938
		glycosyl compound biosynthetic process	2.83e-05
		glycosyl compound metabolic process	5.69e-24
		glycosylation	6.3e-06
		glyoxylate cycle	0.0255
		glyoxylate metabolic process	2.71e-06
		Golgi localization	0.0025
		Golgi organization	0.000705
		Golgi transport vesicle coating	2.03e-05
		Golgi vesicle budding	0.000165
		Golgi vesicle transport	1.15e-12
		growth of symbiont in host	0.046
		heme catabolic process	0.0337
		heme metabolic process	0.00814
		hemoglobin metabolic process	0.0424
		hemolysis by symbiont of host erythrocytes	0.0135
		hemolysis in other organism	0.0135
		hemolysis in other organism involved in symbiotic interaction	0.0135
		hemostasis	1.53e-12
		hepaticobiliary system development	0.0172
		heterocycle catabolic process	1.68e-21
		heterocycle metabolic process	3.57e-07
		heterotypic cell-cell adhesion	0.024
		hexose biosynthetic process	3.38e-06
		hexose catabolic process	2.55e-06
		hexose metabolic process	8.35e-09
		high-density lipoprotein particle assembly	0.00579
		high-density lipoprotein particle remodeling	0.0334
		histone mRNA metabolic process	0.0424
		homeostatic process	3.87e-08
		hormone metabolic process	7.46e-05
		humoral immune response	0.000141
		humoral immune response mediated by circulating immunoglobulin	0.000168
		hyaluronan metabolic process	0.0399
		hydrogen ion transmembrane transport	5.9e-09
		hydrogen peroxide biosynthetic process	0.041
		hydrogen peroxide catabolic process	2.24e-12
		hydrogen peroxide metabolic process	5.87e-11
		hydrogen transport	2.63e-07
		immune effector process	0.000104
		immune response	0.000108
		immune response-activating cell surface receptor signaling pathway	3.25e-10
		immune response-activating signal transduction	6.09e-08
		immune response-regulating cell surface receptor signaling pathway	1.08e-05
		immune response-regulating cell surface receptor signaling pathway involved in phagocytosis	6.3e-06
		immune response-regulating signaling pathway	3.7e-05
		immune system process	1.78e-08
		immunoglobulin mediated immune response	0.00126
		inclusion body assembly	0.0496
		inflammatory response	0.0198
		innate immune response	3.36e-06
		innate immune response activating cell surface receptor signaling pathway	4.48e-07
		innate immune response-activating signal transduction	0.000148
		inner mitochondrial membrane organization	0.00143
		inorganic ion homeostasis	0.0248
		insulin receptor signaling pathway	0.00124
		interaction with host	0.000441
		interaction with symbiont	0.000773
		interleukin-1 beta biosynthetic process	0.0255
		intermediate filament cytoskeleton organization	0.00055
		intermediate filament organization	0.00312
		intermediate filament-based process	0.000617
		interspecies interaction between organisms	2.09e-42
		intestinal absorption	0.00814
		intestinal cholesterol absorption	0.0197
		intestinal lipid absorption	0.0197
		intracellular copper ion transport	0.00496
		intracellular protein transport	3.62e-24
		intracellular sequestering of iron ion	0.0426
		intracellular signal transduction involved in G1 DNA damage checkpoint	1.15e-09
		intracellular transport	2.28e-30
		intrinsic apoptotic signaling pathway	0.000141
		intrinsic apoptotic signaling pathway in response to oxidative stress	0.00179
		ion homeostasis	0.0423
		IRE1-mediated unfolded protein response	0.0015
		IRES-dependent translational initiation	0.000462
		IRES-dependent viral translational initiation	3.34e-05
		iron ion homeostasis	0.0217
		isocitrate metabolic process	0.00261
		isoprenoid metabolic process	2.71e-05
		keratan sulfate biosynthetic process	0.0385
		keratan sulfate catabolic process	1.66e-07
		keratan sulfate metabolic process	0.00328
		keratinocyte differentiation	0.0135
		ketone body biosynthetic process	0.0348
		ketone body catabolic process	0.0087
		ketone body metabolic process	0.0143
		killing by host of symbiont cells	0.0424
		killing of cells in other organism involved in symbiotic interaction	0.0209
		lactose biosynthetic process	0.0426
		lactose metabolic process	0.0426
		lamellipodium assembly	0.0452
		lamellipodium organization	0.0337
		leucine catabolic process	0.00261
		leucine metabolic process	0.00048
		leukocyte migration	0.0011
		leukocyte migration involved in inflammatory response	0.0135
		L-glutamate transport	0.0348
		lipid catabolic process	7.11e-05
		lipid homeostasis	0.044
		lipid localization	0.0099
		lipid metabolic process	9.31e-06
		lipid modification	0.00128
		lipid oxidation	4.18e-05
		lipid transport	0.021
		liver development	0.0144
		localization	1.58e-35
		localization of cell	0.000207
		localization within membrane	0.000701
		locomotion	6.89e-09
		low-density lipoprotein particle clearance	0.0255
		low-density lipoprotein particle receptor biosynthetic process	0.0295
		low-density lipoprotein particle receptor catabolic process	0.0135
		low-density lipoprotein receptor particle metabolic process	0.000443
		L-phenylalanine catabolic process	0.0348
		L-phenylalanine metabolic process	0.00818
		macroautophagy	0.000596
		macromitophagy	0.00121
		macromolecular complex assembly	8.16e-30
		macromolecular complex disassembly	2.9e-28
		macromolecular complex remodeling	0.0317
		macromolecular complex subunit organization	2.9e-33
		macromolecule biosynthetic process	4.91e-05
		macromolecule catabolic process	9.43e-28
		macromolecule glycosylation	5.39e-06
		macromolecule localization	6.21e-26
		macromolecule metabolic process	7.86e-14
		macrophage chemotaxis	0.0424
		maintenance of location	8.65e-07
		maintenance of location in cell	8.58e-06
		maintenance of protein location	0.000292
		maintenance of protein location in cell	0.000663
		malate metabolic process	0.041
		mammary gland involution	0.0143
		MAPK cascade	0.021
		maturation of SSU-rRNA	0.00879
		maturation of SSU-rRNA from tricistronic rRNA transcript (SSU-rRNA, 5.8S rRNA, LSU-rRNA)	0.0102
		meiotic spindle organization	0.0105
		membrane assembly	0.0154
		membrane biogenesis	0.0246
		membrane budding	1.09e-07
		membrane invagination	0.000123
		membrane organization	1.95e-29
		membrane raft assembly	2.64e-05
		membrane raft organization	0.00168
		membrane repolarization during action potential	0.0422
		metabolic process	1.4e-54
		microtubule polymerization or depolymerization	0.0337
		microtubule-based process	0.0286
		midbrain development	0.000332
		mitochondrial acetyl-CoA biosynthetic process from pyruvate	0.017
		mitochondrial ATP synthesis coupled electron transport	4.36e-14
		mitochondrial ATP synthesis coupled proton transport	6.24e-09
		mitochondrial electron transport, cytochrome c to oxygen	1.48e-06
		mitochondrial electron transport, NADH to ubiquinone	6.32e-07
		mitochondrial electron transport, ubiquinol to cytochrome c	5.01e-06
		mitochondrial membrane organization	2.3e-05
		mitochondrial outer membrane permeabilization	0.0165
		mitochondrial outer membrane permeabilization involved in programmed cell death	0.0241
		mitochondrial respiratory chain complex assembly	0.000996
		mitochondrial respiratory chain complex I assembly	0.00254
		mitochondrial respiratory chain complex I biogenesis	0.00254
		mitochondrial transmembrane transport	1.7e-07
		mitochondrial transport	7.08e-06
		mitochondrion disassembly	0.00849
		mitochondrion morphogenesis	0.0365
		mitochondrion organization	1.34e-09
		mitophagy	0.00849
		mitophagy in response to mitochondrial depolarization	0.000773
		mitotic cell cycle	0.0349
		mitotic cell cycle checkpoint	0.00377
		mitotic cell cycle phase transition	0.00179
		mitotic cell cycle process	0.0175
		mitotic DNA damage checkpoint	3.44e-06
		mitotic DNA integrity checkpoint	3.73e-06
		mitotic G1 DNA damage checkpoint	7.95e-08
		mitotic G1/S transition checkpoint	7.95e-08
		mitotic nuclear envelope reassembly	0.00669
		mitotic spindle organization	0.0424
		modification by host of symbiont morphology or physiology	0.00172
		modification of morphology or physiology of other organism	0.00772
		modification of morphology or physiology of other organism involved in symbiotic interaction	0.00238
		modification-dependent macromolecule catabolic process	0.0133
		modification-dependent protein catabolic process	0.0101
		modulation by host of viral genome replication	0.041
		modulation by host of viral process	0.000441
		monocarboxylic acid biosynthetic process	0.00859
		monocarboxylic acid catabolic process	1.4e-06
		monocarboxylic acid metabolic process	4.7e-15
		monosaccharide biosynthetic process	5.96e-09
		monosaccharide catabolic process	1.86e-08
		monosaccharide metabolic process	4.2e-10
		morphogenesis of a polarized epithelium	1.43e-15
		morphogenesis of an epithelium	0.000152
		movement in environment of other organism involved in symbiotic interaction	0.0099
		movement in host environment	0.0099
		movement of cell or subcellular component	4.27e-11
		mRNA 3'-end processing	0.000219
		mRNA catabolic process	3.35e-26
		mRNA export from nucleus	0.00113
		mRNA metabolic process	5.98e-35
		mRNA processing	5.56e-13
		mRNA splice site selection	0.0103
		mRNA splicing, via spliceosome	2.74e-19
		mRNA stabilization	0.0182
		mRNA transport	6.47e-05
		mRNA-containing ribonucleoprotein complex export from nucleus	0.00113
		mucopolysaccharide metabolic process	0.0018
		multicellular organism catabolic process	3.15e-08
		multicellular organism development	8.06e-07
		multicellular organism metabolic process	1.47e-06
		multicellular organismal macromolecule metabolic process	3.24e-07
		multicellular organismal process	3.61e-09
		multi-organism cellular process	7.81e-39
		multi-organism metabolic process	2.74e-23
		multi-organism process	1.49e-20
		muscle cell cellular homeostasis	0.0317
		muscle contraction	4.57e-05
		muscle filament sliding	0.00209
		muscle system process	4.38e-05
		NAD metabolic process	1.17e-08
		NADH dehydrogenase complex assembly	0.00254
		NADH metabolic process	1.08e-09
		NADH regeneration	9.64e-06
		NADP metabolic process	3.71e-06
		NADPH regeneration	0.00225
		ncRNA metabolic process	4.91e-13
		ncRNA processing	1.63e-11
		negative regulation by host of viral process	0.0348
		negative regulation of actin filament depolymerization	7.5e-05
		negative regulation of actin filament polymerization	1.88e-05
		negative regulation of apoptotic process	4.51e-09
		negative regulation of apoptotic signaling pathway	0.00401
		negative regulation of biological process	6.82e-09
		negative regulation of blood coagulation	1.56e-07
		negative regulation of canonical Wnt signaling pathway	0.000266
		negative regulation of catalytic activity	1.24e-12
		negative regulation of cation channel activity	0.021
		negative regulation of cell communication	0.0133
		negative regulation of cell cycle G1/S phase transition	7.36e-06
		negative regulation of cell cycle phase transition	0.0049
		negative regulation of cell cycle process	0.0185
		negative regulation of cell death	5.41e-10
		negative regulation of cellular amide metabolic process	0.000241
		negative regulation of cellular component organization	1.25e-06
		negative regulation of cellular metabolic process	0.000498
		negative regulation of cellular process	1.18e-08
		negative regulation of cellular protein metabolic process	1.07e-10
		negative regulation of cellular response to oxidative stress	0.00728
		negative regulation of cholesterol biosynthetic process	0.0196
		negative regulation of cholesterol metabolic process	0.0196
		negative regulation of coagulation	2.23e-07
		negative regulation of complement activation, lectin pathway	0.0426
		negative regulation of cytoplasmic transport	0.0464
		negative regulation of cytoskeleton organization	3.27e-06
		negative regulation of endocytosis	0.00103
		negative regulation of endopeptidase activity	3.16e-07
		negative regulation of endothelial cell chemotaxis	0.0426
		negative regulation of endothelial cell proliferation	0.021
		negative regulation of extracellular matrix disassembly	0.0426
		negative regulation of extracellular matrix organization	0.0196
		negative regulation of extrinsic apoptotic signaling pathway	0.0486
		negative regulation of fibrinolysis	0.00113
		negative regulation of G1/S transition of mitotic cell cycle	5.2e-06
		negative regulation of hemostasis	1.56e-07
		negative regulation of hydrolase activity	8.95e-07
		negative regulation of intracellular transport	0.0118
		negative regulation of intrinsic apoptotic signaling pathway	0.0194
		negative regulation of ion transmembrane transporter activity	0.0324
		negative regulation of ligase activity	1.43e-08
		negative regulation of lipase activity	0.0025
		negative regulation of lipid transport	0.00317
		negative regulation of lipoprotein metabolic process	0.00261
		negative regulation of lipoprotein particle clearance	0.0196
		negative regulation of low-density lipoprotein particle receptor biosynthetic process	0.0426
		negative regulation of macromolecule metabolic process	0.00145
		negative regulation of megakaryocyte differentiation	0.0255
		negative regulation of metabolic process	1.34e-05
		negative regulation of microtubule depolymerization	0.0356
		negative regulation of microtubule polymerization or depolymerization	0.00765
		negative regulation of mitochondrial outer membrane permeabilization involved in apoptotic signaling pathway	0.0135
		negative regulation of mitochondrial RNA catabolic process	0.0255
		negative regulation of mitotic cell cycle	0.0386
		negative regulation of mitotic cell cycle phase transition	0.00627
		negative regulation of molecular function	5.15e-10
		negative regulation of mRNA metabolic process	0.00459
		negative regulation of mRNA processing	0.0153
		negative regulation of mRNA splicing, via spliceosome	0.00104
		negative regulation of multi-organism process	0.0337
		negative regulation of neuron apoptotic process	0.0497
		negative regulation of organelle organization	0.000323
		negative regulation of oxidative stress-induced cell death	0.0168
		negative regulation of oxidative stress-induced intrinsic apoptotic signaling pathway	0.0453
		negative regulation of peptidase activity	1.1e-06
		negative regulation of phagocytosis	0.0255
		negative regulation of programmed cell death	4.72e-09
		negative regulation of protein complex assembly	1.81e-05
		negative regulation of protein complex disassembly	7.68e-05
		negative regulation of protein depolymerization	6.34e-05
		negative regulation of protein metabolic process	7.59e-12
		negative regulation of protein modification by small protein conjugation or removal	4.11e-07
		negative regulation of protein modification process	0.000112
		negative regulation of protein polymerization	4.88e-07
		negative regulation of protein ubiquitination	8.91e-07
		negative regulation of proteolysis	0.000804
		negative regulation of release of sequestered calcium ion into cytosol	0.0255
		negative regulation of response to external stimulus	0.00675
		negative regulation of response to oxidative stress	0.00728
		negative regulation of response to reactive oxygen species	0.0285
		negative regulation of response to stimulus	4.92e-05
		negative regulation of response to wounding	0.00109
		negative regulation of RNA catabolic process	0.0337
		negative regulation of RNA splicing	5.58e-05
		negative regulation of ryanodine-sensitive calcium-release channel activity	0.00818
		negative regulation of signal transduction	0.00524
		negative regulation of signaling	0.0136
		negative regulation of telomere maintenance	0.0309
		negative regulation of telomere maintenance via telomere lengthening	0.0453
		negative regulation of transcription from RNA polymerase I promoter	0.0255
		negative regulation of transferase activity	1e-05
		negative regulation of translation	0.000613
		negative regulation of transmembrane transport	0.0424
		negative regulation of transport	0.000139
		negative regulation of transporter activity	0.0167
		negative regulation of ubiquitin-protein ligase activity involved in mitotic cell cycle	1.43e-09
		negative regulation of ubiquitin-protein transferase activity	8.08e-09
		negative regulation of very-low-density lipoprotein particle clearance	0.0426
		negative regulation of very-low-density lipoprotein particle remodeling	0.0255
		negative regulation of Wnt signaling pathway	0.000737
		negative regulation of wound healing	1.7e-05
		nervous system development	0.000226
		neural nucleus development	0.000505
		neurogenesis	0.000357
		neuron development	2.82e-05
		neuron differentiation	0.000974
		neuron projection development	4.3e-06
		neuron projection guidance	1.55e-05
		neuron projection morphogenesis	1.67e-05
		neutral lipid catabolic process	0.000725
		neutral lipid metabolic process	0.000319
		neutrophil aggregation	0.0106
		neutrophil clearance	0.0106
		neutrophil mediated cytotoxicity	0.0255
		neutrophil mediated immunity	0.0365
		neutrophil mediated killing of symbiont cell	0.0255
		nicotinamide metabolic process	0.0196
		nicotinamide nucleotide metabolic process	7.38e-13
		NIK/NF-kappaB signaling	4.01e-10
		nitric oxide metabolic process	0.0245
		nitrogen compound metabolic process	1.93e-26
		nitrogen compound transport	0.0255
		non-canonical Wnt signaling pathway	7.63e-14
		non-recombinational repair	0.047
		nuclear envelope reassembly	0.00177
		nuclear export	5.36e-06
		nuclear membrane organization	0.0337
		nuclear transport	2.7e-07
		nuclear-transcribed mRNA catabolic process	3.04e-26
		nuclear-transcribed mRNA catabolic process, nonsense-mediated decay	2.14e-35
		nucleic acid transport	2e-06
		nucleobase metabolic process	0.00693
		nucleobase transport	0.0105
		nucleobase-containing compound catabolic process	2.2e-21
		nucleobase-containing compound metabolic process	1.15e-05
		nucleobase-containing compound transport	4.43e-05
		nucleobase-containing small molecule interconversion	0.00104
		nucleobase-containing small molecule metabolic process	5.08e-21
		nucleocytoplasmic transport	5.54e-07
		nucleoside biosynthetic process	2.31e-05
		nucleoside diphosphate biosynthetic process	0.017
		nucleoside diphosphate metabolic process	0.000135
		nucleoside diphosphate phosphorylation	8.64e-05
		nucleoside metabolic process	2.46e-21
		nucleoside monophosphate biosynthetic process	2.07e-07
		nucleoside monophosphate metabolic process	1.54e-23
		nucleoside phosphate biosynthetic process	0.00658
		nucleoside phosphate metabolic process	7.87e-20
		nucleoside triphosphate biosynthetic process	7.13e-08
		nucleoside triphosphate metabolic process	8.71e-24
		nucleosome assembly	0.0258
		nucleosome organization	0.0101
		nucleotide biosynthetic process	0.0137
		nucleotide metabolic process	2.45e-19
		nucleotide phosphorylation	3.75e-05
		nucleotide-excision repair, preincision complex stabilization	0.0462
		nucleus organization	0.00423
		one-carbon metabolic process	0.0295
		organelle assembly	0.021
		organelle disassembly	0.0124
		organelle localization	0.0119
		organelle organization	2.64e-15
		organic acid biosynthetic process	0.000697
		organic acid catabolic process	4.1e-15
		organic acid metabolic process	2.48e-60
		organic cyclic compound catabolic process	5.01e-23
		organic cyclic compound metabolic process	1.27e-09
		organic hydroxy compound catabolic process	0.0255
		organic hydroxy compound metabolic process	2.14e-05
		organic substance biosynthetic process	8.59e-15
		organic substance catabolic process	5.91e-47
		organic substance metabolic process	2.89e-45
		organic substance transport	1.67e-20
		organonitrogen compound biosynthetic process	7.77e-42
		organonitrogen compound catabolic process	4.97e-12
		organonitrogen compound metabolic process	1.59e-84
		organophosphate biosynthetic process	0.00342
		organophosphate metabolic process	4.4e-15
		ossification	0.00691
		osteoblast differentiation	0.000134
		oxidation-reduction process	1.61e-48
		oxidative phosphorylation	2.21e-14
		oxidoreduction coenzyme metabolic process	5.13e-12
		oxoacid metabolic process	5.6e-61
		oxygen transport	0.00309
		pentose biosynthetic process	0.000884
		pentose metabolic process	0.000251
		pentose-phosphate shunt	0.000129
		pentose-phosphate shunt, oxidative branch	0.00496
		peptide biosynthetic process	3.22e-38
		peptide catabolic process	0.0255
		peptide cross-linking	0.0218
		peptide metabolic process	1.5e-47
		peptidyl-amino acid modification	0.0104
		peptidyl-asparagine modification	5.65e-11
		peptidyl-cysteine modification	0.0099
		peptidyl-cysteine oxidation	0.0426
		peptidyl-cysteine S-nitrosylation	0.00798
		peptidyl-cysteine S-trans-nitrosylation	0.0255
		peptidyl-proline modification	0.0217
		peripheral nervous system axon regeneration	0.0295
		phagocytosis	1.99e-13
		phagocytosis, engulfment	2.76e-05
		phagocytosis, recognition	0.000123
		phagolysosome assembly	0.0462
		phenol-containing compound metabolic process	0.017
		phosphate-containing compound metabolic process	1.31e-09
		phospholipid efflux	0.017
		phosphorus metabolic process	7.53e-11
		phosphorylation	0.000163
		phototransduction, visible light	0.0194
		physiological cardiac muscle hypertrophy	0.0453
		physiological muscle hypertrophy	0.0453
		pigment catabolic process	0.0424
		pigment metabolic process	0.0226
		plasma lipoprotein particle assembly	0.0057
		plasma lipoprotein particle clearance	0.000309
		plasma lipoprotein particle remodeling	0.0317
		plasma membrane organization	0.0145
		plasma membrane raft assembly	0.0424
		plasma membrane raft organization	0.0424
		plasminogen activation	0.000278
		platelet activation	1.58e-13
		platelet aggregation	6.62e-05
		platelet degranulation	3.27e-27
		polyamine metabolic process	3.36e-14
		polysaccharide biosynthetic process	0.047
		polysaccharide catabolic process	0.00672
		polysaccharide metabolic process	0.0364
		porphyrin-containing compound biosynthetic process	0.0425
		porphyrin-containing compound metabolic process	0.00143
		positive regulation by host of viral genome replication	0.00261
		positive regulation by host of viral process	0.000462
		positive regulation of actin filament polymerization	0.0003
		positive regulation of apoptotic signaling pathway	0.0285
		positive regulation of ATPase activity	0.00636
		positive regulation of biological process	7.41e-08
		positive regulation of blood coagulation	0.000773
		positive regulation of calcium ion transmembrane transport	0.0184
		positive regulation of calcium ion transmembrane transporter activity	0.025
		positive regulation of canonical Wnt signaling pathway	6.45e-08
		positive regulation of catabolic process	1.49e-05
		positive regulation of catalytic activity	0.00931
		positive regulation of catecholamine metabolic process	0.000427
		positive regulation of cation transmembrane transport	0.0471
		positive regulation of cell adhesion	0.0142
		positive regulation of cell communication	0.00348
		positive regulation of cell cycle	0.00722
		positive regulation of cell cycle arrest	1.26e-07
		positive regulation of cell cycle process	0.000865
		positive regulation of cell morphogenesis involved in differentiation	0.00777
		positive regulation of cell-substrate adhesion	5.2e-06
		positive regulation of cellular amide metabolic process	0.000572
		positive regulation of cellular amine metabolic process	0.00216
		positive regulation of cellular catabolic process	1.18e-05
		positive regulation of cellular component biogenesis	0.00112
		positive regulation of cellular component organization	1.84e-08
		positive regulation of cellular process	1.3e-07
		positive regulation of cellular protein catabolic process	7.52e-07
		positive regulation of cellular protein localization	0.00234
		positive regulation of cellular protein metabolic process	0.0037
		positive regulation of cholesterol esterification	7.9e-05
		positive regulation of chromosome organization	0.0378
		positive regulation of coagulation	0.00224
		positive regulation of complement activation	0.0426
		positive regulation of cyclic-nucleotide phosphodiesterase activity	0.0426
		positive regulation of cytoskeleton organization	0.00136
		positive regulation of defense response	0.00212
		positive regulation of DNA binding	0.0455
		positive regulation of DNA metabolic process	0.00471
		positive regulation of DNA replication	0.00511
		positive regulation of dopamine metabolic process	0.000427
		positive regulation of endocytic recycling	0.0087
		positive regulation of endocytosis	0.032
		positive regulation of endopeptidase activity	0.0295
		positive regulation of establishment of protein localization	0.00367
		positive regulation of establishment of protein localization to telomere	9.2e-05
		positive regulation of hemostasis	0.000773
		positive regulation of heterotypic cell-cell adhesion	0.0255
		positive regulation of homeostatic process	0.0102
		positive regulation of immune response	8.6e-09
		positive regulation of immune system process	4.72e-07
		positive regulation of inclusion body assembly	0.0196
		positive regulation of innate immune response	0.000514
		positive regulation of intracellular signal transduction	0.00447
		positive regulation of intracellular transport	0.00135
		positive regulation of intrinsic apoptotic signaling pathway	0.0467
		positive regulation of kinase activity	0.023
		positive regulation of lamellipodium assembly	0.00216
		positive regulation of lamellipodium organization	0.0121
		positive regulation of ligase activity	5.9e-10
		positive regulation of lipid catabolic process	0.00798
		positive regulation of MAPK cascade	0.0148
		positive regulation of membrane potential	0.0348
		positive regulation of mitochondrial membrane permeability	0.0134
		positive regulation of mitochondrial membrane permeability involved in apoptotic process	0.0241
		positive regulation of mitochondrial outer membrane permeabilization involved in apoptotic signaling pathway	0.0461
		positive regulation of molecular function	0.00675
		positive regulation of multi-organism process	0.0483
		positive regulation of nonmotile primary cilium assembly	0.0135
		positive regulation of nuclease activity	0.000441
		positive regulation of organelle organization	2.55e-06
		positive regulation of peptidase activity	0.00966
		positive regulation of phagocytosis	0.00741
		positive regulation of plasminogen activation	0.0087
		positive regulation of protein activation cascade	0.0426
		positive regulation of protein catabolic process	2.18e-05
		positive regulation of protein complex assembly	4.64e-05
		positive regulation of protein kinase activity	0.0209
		positive regulation of protein localization to Cajal body	5.01e-06
		positive regulation of protein localization to chromosome, telomeric region	2.62e-05
		positive regulation of protein localization to nucleus	0.032
		positive regulation of protein maturation	0.00372
		positive regulation of protein metabolic process	0.00212
		positive regulation of protein modification by small protein conjugation or removal	2.41e-06
		positive regulation of protein phosphorylation	0.0461
		positive regulation of protein polymerization	0.0015
		positive regulation of protein processing	0.00261
		positive regulation of protein ubiquitination	5.89e-06
		positive regulation of protein ubiquitination involved in ubiquitin-dependent protein catabolic process	1.71e-08
		positive regulation of proteolysis	5.5e-07
		positive regulation of proteolysis involved in cellular protein catabolic process	6.84e-06
		positive regulation of reactive oxygen species metabolic process	0.0358
		positive regulation of respiratory burst	0.00401
		positive regulation of respiratory burst involved in inflammatory response	0.0106
		positive regulation of response to stimulus	1.74e-06
		positive regulation of RNA polymerase II transcriptional preinitiation complex assembly	0.0197
		positive regulation of RNA splicing	0.021
		positive regulation of sequestering of calcium ion	0.0334
		positive regulation of signal transduction	0.00437
		positive regulation of signaling	0.00359
		positive regulation of steroid metabolic process	0.0337
		positive regulation of substrate adhesion-dependent cell spreading	5.45e-06
		positive regulation of superoxide anion generation	0.0337
		positive regulation of telomerase RNA localization to Cajal body	4.33e-06
		positive regulation of telomere maintenance	0.00104
		positive regulation of telomere maintenance via telomerase	0.00136
		positive regulation of telomere maintenance via telomere lengthening	0.00265
		positive regulation of toll-like receptor signaling pathway	0.046
		positive regulation of transferase activity	0.00732
		positive regulation of translation	0.00223
		positive regulation of transport	0.000271
		positive regulation of transporter activity	0.0271
		positive regulation of triglyceride catabolic process	0.0196
		positive regulation of triglyceride lipase activity	0.0135
		positive regulation of tumor necrosis factor biosynthetic process	0.0255
		positive regulation of ubiquitin-protein ligase activity involved in regulation of mitotic cell cycle transition	1.52e-10
		positive regulation of ubiquitin-protein transferase activity	1.44e-10
		positive regulation of viral genome replication	0.0285
		positive regulation of viral life cycle	0.00969
		positive regulation of viral process	0.00113
		positive regulation of Wnt signaling pathway	1.18e-05
		positive regulation of wound healing	0.00157
		post-embryonic eye morphogenesis	0.0348
		post-Golgi vesicle-mediated transport	0.000695
		posttranscriptional regulation of gene expression	3.66e-22
		post-translational protein modification	5.88e-06
		primary alcohol metabolic process	1.94e-07
		primary metabolic process	1.17e-35
		programmed cell death	3.17e-08
		prolactin secretion	0.0196
		proteasomal protein catabolic process	0.00396
		proteasome-mediated ubiquitin-dependent protein catabolic process	0.0078
		protein activation cascade	1.52e-13
		protein autoprocessing	0.0229
		protein catabolic process	2.01e-05
		protein complex assembly	6.51e-22
		protein complex biogenesis	6.51e-22
		protein complex disassembly	2.24e-28
		protein complex subunit organization	3.62e-45
		protein depolymerization	4.35e-06
		protein export from nucleus	0.00675
		protein folding	8.56e-24
		protein folding in endoplasmic reticulum	0.00116
		protein glycosylation	5.39e-06
		protein heterooligomerization	0.000705
		protein homooligomerization	4.54e-05
		protein homotetramerization	2.58e-06
		protein import into mitochondrial inner membrane	0.0426
		protein localization	1.58e-22
		protein localization to Cajal body	7.92e-06
		protein localization to chromosome	0.00818
		protein localization to chromosome, telomeric region	0.000422
		protein localization to cytoplasmic stress granule	0.000884
		protein localization to endoplasmic reticulum	2.16e-42
		protein localization to lysosome	0.0422
		protein localization to membrane	1.98e-19
		protein localization to membrane raft	0.0143
		protein localization to mitochondrion	0.0189
		protein localization to nuclear body	7.92e-06
		protein localization to nucleoplasm	7.92e-06
		protein localization to nucleus	0.0255
		protein localization to organelle	8.75e-23
		protein localization to vacuole	0.0196
		protein maturation	2.39e-07
		protein maturation by protein folding	0.00796
		protein metabolic process	1.19e-26
		protein nitrosylation	0.00798
		protein N-linked glycosylation	1.63e-10
		protein N-linked glycosylation via asparagine	5.25e-11
		protein oligomerization	3.17e-08
		protein oxidation	0.00048
		protein peptidyl-prolyl isomerization	0.00796
		protein polymerization	2.03e-05
		protein polyubiquitination	0.00133
		protein processing	1.94e-06
		protein refolding	0.0143
		protein stabilization	3.65e-09
		protein targeting	1.38e-17
		protein targeting to ER	1.44e-44
		protein targeting to membrane	1.42e-27
		protein tetramerization	1.33e-06
		protein transmembrane transport	0.0376
		protein transport	3.6e-20
		protein ubiquitination involved in ubiquitin-dependent protein catabolic process	0.00263
		protein unfolding	0.0426
		protein-chromophore linkage	0.0462
		protein-DNA complex assembly	0.0135
		protein-DNA complex subunit organization	0.0052
		protein-lipid complex assembly	0.0348
		protein-lipid complex remodeling	0.0317
		proteolysis	1.47e-16
		proteolysis involved in cellular protein catabolic process	0.00024
		proton transport	1.7e-07
		pteridine-containing compound biosynthetic process	0.0165
		purine nucleobase metabolic process	0.0295
		purine nucleobase transport	0.00261
		purine nucleoside biosynthetic process	1.49e-05
		purine nucleoside diphosphate biosynthetic process	0.0209
		purine nucleoside diphosphate metabolic process	0.000266
		purine nucleoside metabolic process	5.56e-21
		purine nucleoside monophosphate biosynthetic process	6.31e-08
		purine nucleoside monophosphate metabolic process	3.49e-23
		purine nucleoside triphosphate biosynthetic process	4.86e-06
		purine nucleoside triphosphate metabolic process	6.24e-23
		purine nucleotide metabolic process	2.81e-12
		purine ribonucleoside biosynthetic process	1.49e-05
		purine ribonucleoside diphosphate biosynthetic process	0.0209
		purine ribonucleoside diphosphate metabolic process	0.000266
		purine ribonucleoside metabolic process	9.61e-21
		purine ribonucleoside monophosphate biosynthetic process	6.31e-08
		purine ribonucleoside monophosphate metabolic process	3.11e-23
		purine ribonucleoside triphosphate biosynthetic process	2.92e-06
		purine ribonucleoside triphosphate metabolic process	5.15e-24
		purine ribonucleotide metabolic process	8.64e-12
		purine-containing compound biosynthetic process	0.0317
		purine-containing compound metabolic process	1.72e-12
		pyridine nucleotide metabolic process	7.38e-13
		pyridine-containing compound metabolic process	9.58e-15
		pyrimidine deoxyribonucleotide biosynthetic process	0.0209
		pyrimidine nucleotide biosynthetic process	0.0309
		pyrimidine nucleotide metabolic process	0.0401
		pyrimidine-containing compound biosynthetic process	0.0295
		pyruvate metabolic process	1.22e-06
		Ras protein signal transduction	0.0137
		reactive nitrogen species metabolic process	0.00456
		reactive oxygen species biosynthetic process	0.00387
		reactive oxygen species metabolic process	8.3e-09
		receptor-mediated endocytosis	2.39e-07
		regeneration	0.00707
		regulated exocytosis	3.09e-11
		regulation of acetyl-CoA biosynthetic process from pyruvate	0.00475
		regulation of actin cytoskeleton organization	1.31e-06
		regulation of actin filament depolymerization	3.77e-07
		regulation of actin filament length	2.26e-07
		regulation of actin filament polymerization	3.9e-06
		regulation of actin filament-based process	2.94e-07
		regulation of actin polymerization or depolymerization	1.94e-07
		regulation of activation of membrane attack complex	0.0255
		regulation of acute inflammatory response	0.0066
		regulation of acyl-CoA biosynthetic process	0.00145
		regulation of amyloid precursor protein catabolic process	0.0255
		regulation of anatomical structure morphogenesis	1.95e-06
		regulation of anatomical structure size	8.88e-05
		regulation of angiotensin levels in blood	0.0143
		regulation of angiotensin metabolic process	0.017
		regulation of apoptotic cell clearance	0.0209
		regulation of apoptotic process	1.98e-07
		regulation of apoptotic signaling pathway	0.000381
		regulation of ATPase activity	0.00206
		regulation of beta-amyloid clearance	0.0424
		regulation of biological process	0.00155
		regulation of biological quality	5.77e-30
		regulation of blood coagulation	5.2e-06
		regulation of body fluid levels	4.82e-10
		regulation of canonical Wnt signaling pathway	0.00111
		regulation of catabolic process	7.78e-07
		regulation of catalytic activity	3.23e-07
		regulation of catecholamine metabolic process	0.0107
		regulation of Cdc42 protein signal transduction	0.0426
		regulation of cell adhesion	0.00401
		regulation of cell adhesion molecule production	0.0255
		regulation of cell communication	0.0255
		regulation of cell cycle arrest	2.47e-06
		regulation of cell cycle G1/S phase transition	7.59e-05
		regulation of cell cycle phase transition	0.0419
		regulation of cell death	1.71e-08
		regulation of cell growth involved in cardiac muscle cell development	0.0135
		regulation of cell migration	0.00819
		regulation of cell morphogenesis	0.0454
		regulation of cell motility	0.00513
		regulation of cell shape	0.0485
		regulation of cell-substrate adhesion	0.000151
		regulation of cellular amide metabolic process	3.4e-10
		regulation of cellular amine metabolic process	4.64e-14
		regulation of cellular amino acid metabolic process	1.2e-13
		regulation of cellular catabolic process	2.2e-07
		regulation of cellular component biogenesis	8.52e-06
		regulation of cellular component movement	0.00202
		regulation of cellular component organization	1.33e-12
		regulation of cellular component size	8.45e-06
		regulation of cellular ketone metabolic process	1.49e-09
		regulation of cellular localization	0.00136
		regulation of cellular process	0.0182
		regulation of cellular protein catabolic process	1.54e-05
		regulation of cellular protein localization	0.00139
		regulation of cellular protein metabolic process	4.59e-10
		regulation of cellular response to oxidative stress	0.000655
		regulation of cellular response to stress	0.00107
		regulation of centrosome duplication	0.0334
		regulation of cholesterol biosynthetic process	0.0375
		regulation of cholesterol esterification	0.000323
		regulation of cholesterol import	0.0255
		regulation of coagulation	1.22e-05
		regulation of complement activation	5.58e-05
		regulation of complement activation, lectin pathway	0.0426
		regulation of cysteine-type endopeptidase activity	0.0174
		regulation of cysteine-type endopeptidase activity involved in apoptotic process	0.0128
		regulation of cytoplasmic transport	0.0309
		regulation of cytoskeleton organization	4.34e-09
		regulation of defense response	9.69e-07
		regulation of deoxyribonuclease activity	0.00796
		regulation of developmental process	0.00648
		regulation of DNA metabolic process	0.00642
		regulation of DNA replication	0.0207
		regulation of dopamine metabolic process	0.00938
		regulation of endocytosis	0.000341
		regulation of endodeoxyribonuclease activity	0.00579
		regulation of endopeptidase activity	8.84e-09
		regulation of endothelial cell proliferation	0.0337
		regulation of ER-associated ubiquitin-dependent protein catabolic process	0.0462
		regulation of establishment of planar polarity	1.5e-14
		regulation of establishment of protein localization	0.00145
		regulation of establishment of protein localization to chromosome	0.000443
		regulation of establishment of protein localization to telomere	0.000182
		regulation of extracellular matrix disassembly	0.0334
		regulation of extracellular matrix organization	0.0334
		regulation of fibril organization	0.00496
		regulation of fibrinolysis	0.000648
		regulation of fibroblast proliferation	0.0413
		regulation of G1/S transition of mitotic cell cycle	5.94e-05
		regulation of hemostasis	5.2e-06
		regulation of heterotypic cell-cell adhesion	0.0197
		regulation of hormone levels	0.00229
		regulation of humoral immune response	0.000855
		regulation of hydrolase activity	3.72e-05
		regulation of immune response	4.5e-06
		regulation of immune system process	5.98e-06
		regulation of inclusion body assembly	0.046
		regulation of inflammatory response	0.00157
		regulation of innate immune response	0.000614
		regulation of intestinal absorption	0.0424
		regulation of intestinal cholesterol absorption	0.0255
		regulation of intestinal lipid absorption	0.0255
		regulation of intracellular signal transduction	0.0344
		regulation of intracellular transport	0.000187
		regulation of intrinsic apoptotic signaling pathway	0.000641
		regulation of kinase activity	0.0123
		regulation of lamellipodium assembly	0.002
		regulation of lamellipodium organization	0.0081
		regulation of ligase activity	2.12e-09
		regulation of lipid transport	0.0337
		regulation of lipoprotein lipase activity	0.00818
		regulation of lipoprotein particle clearance	0.017
		regulation of localization	1.92e-05
		regulation of locomotion	0.000552
		regulation of low-density lipoprotein particle receptor biosynthetic process	0.017
		regulation of low-density lipoprotein particle receptor catabolic process	0.0135
		regulation of macroautophagy	0.0426
		regulation of MAP kinase activity	0.0065
		regulation of MAPK cascade	0.0134
		regulation of membrane permeability	0.00122
		regulation of metabolic process	0.0272
		regulation of microtubule cytoskeleton organization	0.00675
		regulation of microtubule depolymerization	0.0426
		regulation of microtubule polymerization or depolymerization	0.0235
		regulation of microtubule-based process	0.0104
		regulation of mitochondrial membrane permeability	0.0087
		regulation of mitochondrial membrane permeability involved in apoptotic process	0.0175
		regulation of mitochondrial membrane potential	0.00511
		regulation of mitochondrial outer membrane permeabilization involved in apoptotic signaling pathway	0.00574
		regulation of mitochondrion organization	0.0332
		regulation of mitotic cell cycle phase transition	0.035
		regulation of mitotic spindle assembly	0.017
		regulation of mitotic spindle organization	0.0187
		regulation of molecular function	8.53e-06
		regulation of monooxygenase activity	0.0212
		regulation of mRNA metabolic process	0.00199
		regulation of mRNA processing	0.00886
		regulation of mRNA splicing, via spliceosome	0.00172
		regulation of mRNA stability	1.37e-15
		regulation of multicellular organismal process	0.0218
		regulation of multi-organism process	0.00202
		regulation of nonmotile primary cilium assembly	0.0424
		regulation of nuclease activity	0.000209
		regulation of organ morphogenesis	8.92e-06
		regulation of organelle assembly	0.0458
		regulation of organelle organization	4.4e-09
		regulation of oxidative stress-induced cell death	0.00497
		regulation of oxidative stress-induced intrinsic apoptotic signaling pathway	0.006
		regulation of peptidase activity	3.47e-09
		regulation of phagocytosis	0.000369
		regulation of phosphate metabolic process	0.0115
		regulation of phosphorus metabolic process	0.00405
		regulation of phosphorylation	0.0123
		regulation of plasma lipoprotein particle levels	0.003
		regulation of plasminogen activation	0.017
		regulation of programmed cell death	1.41e-07
		regulation of protein activation cascade	3.66e-06
		regulation of protein catabolic process	7.86e-05
		regulation of protein complex assembly	6.1e-10
		regulation of protein complex disassembly	3.6e-07
		regulation of protein depolymerization	3.54e-06
		regulation of protein kinase activity	0.00509
		regulation of protein localization	0.00041
		regulation of protein localization to Cajal body	5.01e-06
		regulation of protein localization to chromosome, telomeric region	1.49e-05
		regulation of protein localization to nucleus	0.0248
		regulation of protein maturation	0.000407
		regulation of protein metabolic process	1.93e-11
		regulation of protein modification by small protein conjugation or removal	7.9e-06
		regulation of protein modification process	0.0147
		regulation of protein phosphorylation	0.00732
		regulation of protein polymerization	1.73e-06
		regulation of protein processing	0.000348
		regulation of protein serine/threonine kinase activity	0.011
		regulation of protein stability	5.07e-09
		regulation of protein transport	0.0179
		regulation of protein ubiquitination	2.3e-05
		regulation of protein ubiquitination involved in ubiquitin-dependent protein catabolic process	4.08e-07
		regulation of proteolysis	1.05e-11
		regulation of proteolysis involved in cellular protein catabolic process	0.000206
		regulation of reactive oxygen species biosynthetic process	0.0403
		regulation of reactive oxygen species metabolic process	0.0252
		regulation of receptor biosynthetic process	0.0285
		regulation of receptor catabolic process	0.0424
		regulation of respiratory burst	0.000336
		regulation of response to external stimulus	5.48e-05
		regulation of response to oxidative stress	0.00116
		regulation of response to reactive oxygen species	0.0153
		regulation of response to stimulus	4.01e-05
		regulation of response to stress	2.59e-09
		regulation of response to wounding	0.000144
		regulation of RNA polymerase II transcriptional preinitiation complex assembly	0.0143
		regulation of RNA splicing	0.000242
		regulation of RNA stability	3.23e-15
		regulation of sodium ion transmembrane transporter activity	0.0488
		regulation of spindle assembly	0.0293
		regulation of spindle organization	0.0285
		regulation of sterol import	0.0255
		regulation of substrate adhesion-dependent cell spreading	1.65e-05
		regulation of sulfur metabolic process	0.00333
		regulation of superoxide metabolic process	0.0235
		regulation of symbiosis, encompassing mutualism through parasitism	3.31e-05
		regulation of systemic arterial blood pressure by circulatory renin-angiotensin	0.0375
		regulation of T cell mediated immune response to tumor cell	0.0255
		regulation of telomerase RNA localization to Cajal body	4.33e-06
		regulation of telomere maintenance	0.000173
		regulation of telomere maintenance via telomerase	0.000422
		regulation of telomere maintenance via telomere lengthening	0.000452
		regulation of transferase activity	0.00154
		regulation of translation	1e-09
		regulation of translational elongation	0.0114
		regulation of translational fidelity	0.01
		regulation of translational initiation	8.1e-05
		regulation of translational initiation in response to stress	0.0422
		regulation of transport	0.000411
		regulation of transporter activity	0.0279
		regulation of ubiquitin-protein ligase activity involved in mitotic cell cycle	4.85e-10
		regulation of ubiquitin-protein transferase activity	9.44e-10
		regulation of ubiquitin-specific protease activity	0.0426
		regulation of very-low-density lipoprotein particle clearance	0.0426
		regulation of vesicle-mediated transport	0.000106
		regulation of viral life cycle	0.00286
		regulation of viral process	0.00041
		regulation of Wnt signaling pathway	0.00747
		regulation of wound healing	4.3e-05
		removal of superoxide radicals	1.18e-05
		respiratory burst	0.0163
		respiratory electron transport chain	1.16e-20
		response to abiotic stimulus	0.0231
		response to alcohol	0.0225
		response to aluminum ion	0.00796
		response to amino acid	0.0241
		response to axon injury	0.0113
		response to biotic stimulus	0.00516
		response to cadmium ion	0.0119
		response to calcium ion	0.00715
		response to chemical	1.3e-21
		response to cisplatin	0.0424
		response to copper ion	0.00104
		response to cytokine	0.00214
		response to defenses of other organism involved in symbiotic interaction	0.017
		response to drug	0.021
		response to endogenous stimulus	2.17e-08
		response to endoplasmic reticulum stress	3.46e-07
		response to estrogen	0.00351
		response to external biotic stimulus	0.004
		response to external stimulus	3.33e-11
		response to extracellular stimulus	0.0402
		response to fibroblast growth factor	7.36e-05
		response to growth factor	0.000779
		response to hormone	2.38e-08
		response to host	0.017
		response to host defenses	0.017
		response to host immune response	0.0337
		response to hydrogen peroxide	0.0013
		response to hydroperoxide	0.0187
		response to immune response of other organism involved in symbiotic interaction	0.0337
		response to indole-3-methanol	0.00796
		response to inorganic substance	4.64e-14
		response to insulin	0.000136
		response to iron(II) ion	0.0337
		response to lipid	0.0127
		response to lipid hydroperoxide	0.00225
		response to low-density lipoprotein particle	0.0422
		response to metal ion	7.11e-08
		response to misfolded protein	0.046
		response to mitochondrial depolarisation	0.000773
		response to nitrogen compound	2.94e-05
		response to nutrient	0.0273
		response to nutrient levels	0.022
		response to organic cyclic compound	0.000581
		response to organic substance	1.9e-12
		response to organonitrogen compound	0.000125
		response to other organism	0.004
		response to oxidative stress	1.46e-12
		response to oxygen radical	3.42e-06
		response to oxygen-containing compound	3.58e-09
		response to peptide	3.8e-05
		response to peptide hormone	8.51e-06
		response to reactive oxygen species	6.41e-11
		response to selenium ion	0.00113
		response to steroid hormone	0.00495
		response to stimulus	3.71e-15
		response to stress	1.15e-23
		response to superoxide	1.68e-05
		response to topologically incorrect protein	1.52e-06
		response to toxic substance	4.48e-13
		response to transition metal nanoparticle	1.85e-05
		response to tumor necrosis factor	0.000613
		response to unfolded protein	2e-06
		response to vitamin E	0.0197
		response to wounding	9.23e-13
		response to xenobiotic stimulus	2.89e-05
		retina homeostasis	0.0196
		retinoid metabolic process	1.51e-07
		retinol metabolic process	0.00199
		retrograde vesicle-mediated transport, Golgi to ER	1.31e-08
		reverse cholesterol transport	0.0422
		ribonucleoprotein complex assembly	1.73e-11
		ribonucleoprotein complex biogenesis	8.53e-23
		ribonucleoprotein complex export from nucleus	8.9e-05
		ribonucleoprotein complex localization	0.000129
		ribonucleoprotein complex subunit organization	3.49e-10
		ribonucleoside biosynthetic process	8.97e-05
		ribonucleoside diphosphate biosynthetic process	0.0209
		ribonucleoside diphosphate metabolic process	0.000129
		ribonucleoside metabolic process	5.17e-19
		ribonucleoside monophosphate biosynthetic process	2.79e-07
		ribonucleoside monophosphate metabolic process	1.36e-22
		ribonucleoside triphosphate biosynthetic process	1.53e-05
		ribonucleoside triphosphate metabolic process	3.25e-23
		ribonucleotide metabolic process	1.87e-11
		ribose phosphate biosynthetic process	0.046
		ribose phosphate metabolic process	3.98e-13
		ribosomal large subunit assembly	0.000351
		ribosomal large subunit biogenesis	0.000936
		ribosomal small subunit assembly	0.000182
		ribosomal small subunit biogenesis	3.06e-06
		ribosomal small subunit export from nucleus	0.0426
		ribosome assembly	1.69e-06
		ribosome biogenesis	1.41e-16
		RNA 3'-end processing	9.6e-05
		RNA catabolic process	4.61e-27
		RNA export from nucleus	5.04e-05
		RNA localization	3.36e-09
		RNA localization to Cajal body	5.93e-06
		RNA processing	2.2e-23
		RNA secondary structure unwinding	0.0204
		RNA splicing	3.35e-17
		RNA splicing, via transesterification reactions	1.16e-19
		RNA splicing, via transesterification reactions with bulged adenosine as nucleophile	2.74e-19
		RNA stabilization	0.021
		RNA transport	2e-06
		RNA-dependent DNA replication	0.000559
		Roundabout signaling pathway	0.0295
		rRNA export from nucleus	0.0426
		rRNA metabolic process	9.38e-18
		rRNA processing	1.72e-18
		rRNA-containing ribonucleoprotein complex export from nucleus	0.0135
		scaRNA localization to Cajal body	0.0087
		secondary alcohol biosynthetic process	0.0399
		secretion	5.23e-06
		secretion by cell	1.18e-05
		selenium compound metabolic process	6.56e-44
		selenocysteine metabolic process	3.21e-40
		sequestering of iron ion	0.0426
		sequestering of metal ion	0.033
		sequestering of TGFbeta in extracellular matrix	0.0426
		serine family amino acid metabolic process	4.76e-34
		short-chain fatty acid catabolic process	0.0255
		short-chain fatty acid metabolic process	0.0255
		signal peptide processing	0.0255
		signal transduction by p53 class mediator	0.000264
		signal transduction by protein phosphorylation	0.0374
		signal transduction in response to DNA damage	6.84e-06
		signal transduction involved in cell cycle checkpoint	2.11e-09
		signal transduction involved in DNA damage checkpoint	1.88e-09
		signal transduction involved in DNA integrity checkpoint	1.88e-09
		signal transduction involved in mitotic cell cycle checkpoint	5.74e-09
		signal transduction involved in mitotic DNA damage checkpoint	5.74e-09
		signal transduction involved in mitotic DNA integrity checkpoint	5.74e-09
		signal transduction involved in mitotic G1 DNA damage checkpoint	1.15e-09
		single organism cell adhesion	0.0214
		single-multicellular organism process	1.24e-12
		single-organism biosynthetic process	7.17e-17
		single-organism carbohydrate catabolic process	1.15e-08
		single-organism carbohydrate metabolic process	1.38e-14
		single-organism catabolic process	4.74e-39
		single-organism cellular localization	2.08e-15
		single-organism cellular process	1.07e-42
		single-organism developmental process	3.79e-10
		single-organism intracellular transport	4.36e-30
		single-organism localization	8.59e-28
		single-organism membrane budding	1.42e-07
		single-organism membrane organization	7.73e-25
		single-organism metabolic process	2.61e-87
		single-organism organelle organization	1.46e-09
		single-organism process	1.99e-53
		single-organism transport	3.58e-30
		skin development	0.0262
		small GTPase mediated signal transduction	0.00024
		small molecule biosynthetic process	2.31e-09
		small molecule catabolic process	9.24e-23
		small molecule metabolic process	1.3e-78
		smooth muscle cell-matrix adhesion	0.0424
		sorbitol metabolic process	0.0255
		spindle organization	0.0332
		spliceosomal complex assembly	1.76e-06
		spliceosomal snRNP assembly	0.00796
		SRP-dependent cotranslational protein targeting to membrane	1.08e-43
		steroid biosynthetic process	0.0391
		steroid esterification	0.00153
		steroid metabolic process	0.0243
		sterol biosynthetic process	0.0255
		sterol esterification	0.00153
		sterol import	0.0255
		sterol transport	0.0134
		stimulatory C-type lectin receptor signaling pathway	3.46e-07
		substantia nigra development	4.46e-07
		substrate adhesion-dependent cell spreading	2.54e-06
		succinate metabolic process	0.00524
		succinyl-CoA metabolic process	0.00261
		sulfur amino acid metabolic process	0.0248
		sulfur compound biosynthetic process	6e-07
		sulfur compound catabolic process	2.06e-05
		sulfur compound metabolic process	7.82e-14
		superoxide metabolic process	0.00138
		symbiosis, encompassing mutualism through parasitism	1.82e-42
		system development	3.96e-08
		T cell mediated immune response to tumor cell	0.0255
		T cell receptor signaling pathway	5.71e-07
		taxis	5.16e-07
		telomerase RNA localization	5.93e-06
		telomerase RNA localization to Cajal body	5.93e-06
		telomere maintenance	4.71e-06
		telomere maintenance via telomerase	0.000655
		telomere maintenance via telomere lengthening	0.000348
		telomere organization	6.37e-06
		termination of RNA polymerase II transcription	8.56e-07
		terpenoid metabolic process	2.54e-06
		tetrahydrobiopterin biosynthetic process	0.00796
		tetrahydrobiopterin metabolic process	0.0105
		tetrapyrrole metabolic process	0.00769
		thioester biosynthetic process	0.00109
		thioester metabolic process	3.83e-05
		thyroid hormone generation	0.0143
		thyroid hormone metabolic process	0.0255
		tissue development	2.62e-08
		tissue homeostasis	0.00558
		tissue migration	0.0463
		tissue morphogenesis	0.000213
		toxin transport	0.00683
		transition metal ion homeostasis	0.0166
		translation	1.58e-38
		translational elongation	2.26e-29
		translational initiation	6.63e-34
		translational termination	2.51e-30
		transmembrane receptor protein tyrosine kinase signaling pathway	0.000738
		transport	1.16e-39
		tricarboxylic acid cycle	2.46e-14
		tricarboxylic acid metabolic process	6.35e-14
		triglyceride catabolic process	0.00118
		triglyceride metabolic process	0.000587
		triglyceride-rich lipoprotein particle remodeling	0.00796
		tRNA aminoacylation	5.98e-06
		tRNA aminoacylation for protein translation	3.42e-06
		tRNA metabolic process	0.0257
		tubulin complex assembly	0.0337
		tumor necrosis factor-mediated signaling pathway	2.63e-06
		ubiquitin-dependent protein catabolic process	0.021
		uropod organization	0.0106
		valine catabolic process	0.00159
		valine metabolic process	0.00309
		vascular endothelial growth factor receptor signaling pathway	1.49e-05
		vasculature development	0.0471
		very-low-density lipoprotein particle clearance	0.0135
		very-low-density lipoprotein particle remodeling	0.00796
		vesicle coating	1.17e-05
		vesicle localization	0.0367
		vesicle organization	0.000473
		vesicle targeting	1.96e-05
		vesicle targeting, rough ER to cis-Golgi	0.000721
		vesicle targeting, to, from or within Golgi	3.83e-06
		vesicle-mediated transport	4.64e-26
		viral entry into host cell	0.0127
		viral gene expression	3.77e-24
		viral genome replication	0.019
		viral latency	0.00372
		viral life cycle	2.16e-26
		viral process	3.54e-38
		viral release from host cell	0.0146
		viral transcription	2.18e-22
		viral translation	0.00048
		virion assembly	0.0261
		vitamin metabolic process	9.47e-06
		water-soluble vitamin metabolic process	0.0216
		Wnt signaling pathway	0.00554
		Wnt signaling pathway, planar cell polarity pathway	7.96e-15
		wound healing	1.78e-12
		xenobiotic metabolic process	2.69e-05
		xylulose 5-phosphate biosynthetic process	0.0196
		xylulose 5-phosphate metabolic process	0.0196
		xylulose biosynthetic process	0.0255
		xylulose metabolic process	0.0087
		zymogen activation	0.0372

## Sheet: GO BP OverRepresented FVPTC
		Gene ontology Biological Process statistical over-representation against the human database. A statistical correction of the p-value, based on the False Discovery Rate (FDR<5%), was performed in Protein Center, for the follicular variant of papillary thyroid carcinoma (FVPTC) differentially abundant proteins
		Description	FDR p-value
		2-oxoglutarate metabolic process	0.00122
		4-hydroxyproline metabolic process	0.0316
		acetyl-CoA biosynthetic process	0.00357
		acetyl-CoA biosynthetic process from pyruvate	0.00352
		acetyl-CoA metabolic process	0.0117
		acidic amino acid transport	0.0083
		actin cytoskeleton organization	8.68e-09
		actin filament branching	0.047
		actin filament bundle assembly	0.00652
		actin filament bundle organization	0.00956
		actin filament capping	5.17e-05
		actin filament depolymerization	1.45e-07
		actin filament organization	1.53e-07
		actin filament polymerization	0.000196
		actin filament severing	0.00599
		actin filament-based movement	0.000782
		actin filament-based process	2.58e-10
		actin nucleation	0.00182
		actin polymerization or depolymerization	2.09e-05
		actin-mediated cell contraction	0.0109
		actin-myosin filament sliding	0.00497
		activation of immune response	4.32e-10
		activation of innate immune response	8.89e-05
		activation of MAPKK activity	0.000657
		activation of membrane attack complex	0.0183
		actomyosin structure organization	0.0101
		acute inflammatory response	5.47e-05
		acute-phase response	0.000603
		acyl-CoA biosynthetic process	0.00498
		acyl-CoA metabolic process	8.68e-05
		acylglycerol catabolic process	0.000164
		acylglycerol metabolic process	0.000469
		adenine transport	8.39e-05
		adherens junction assembly	0.0462
		adherens junction organization	0.0132
		ADP biosynthetic process	0.00583
		ADP metabolic process	2.55e-05
		aerobic respiration	1.2e-15
		aging	4.26e-05
		alcohol biosynthetic process	0.0101
		alcohol catabolic process	0.0235
		alcohol metabolic process	3.1e-05
		aldehyde catabolic process	0.00853
		alditol metabolic process	0.0123
		alpha-amino acid catabolic process	2.95e-07
		alpha-amino acid metabolic process	9.56e-30
		alternative mRNA splicing, via spliceosome	0.0213
		amide biosynthetic process	4.58e-33
		amine metabolic process	3.35e-10
		amino acid activation	2.48e-06
		aminoglycan biosynthetic process	0.0367
		aminoglycan catabolic process	0.000161
		aminoglycan metabolic process	0.00789
		ammonium ion metabolic process	0.0226
		amyloid fibril formation	0.0488
		anaphase-promoting complex-dependent proteasomal ubiquitin-dependent protein catabolic process	3.69e-08
		anatomical structure development	9.99e-08
		anatomical structure homeostasis	5.35e-06
		anatomical structure morphogenesis	4.09e-07
		angiogenesis	0.0117
		angiotensin maturation	0.0172
		animal organ development	2.27e-06
		antigen processing and presentation	1.22e-09
		antigen processing and presentation of exogenous antigen	1e-09
		antigen processing and presentation of exogenous peptide antigen	2.39e-10
		antigen processing and presentation of exogenous peptide antigen via MHC class I	5.35e-09
		antigen processing and presentation of exogenous peptide antigen via MHC class I, TAP-dependent	2.72e-09
		antigen processing and presentation of exogenous peptide antigen via MHC class II	0.00447
		antigen processing and presentation of peptide antigen	1.56e-10
		antigen processing and presentation of peptide antigen via MHC class I	7.49e-11
		antigen processing and presentation of peptide antigen via MHC class II	0.0074
		antigen processing and presentation of peptide or polysaccharide antigen via MHC class II	0.00345
		antigen receptor-mediated signaling pathway	1.12e-07
		apical junction assembly	0.0252
		apoptotic cell clearance	0.000164
		apoptotic DNA fragmentation	0.0343
		apoptotic mitochondrial changes	0.00973
		apoptotic nuclear changes	0.0183
		apoptotic process	3.42e-10
		apoptotic signaling pathway	0.00063
		arginine catabolic process	0.0467
		arginine metabolic process	0.0413
		aromatic compound catabolic process	2.22e-23
		Arp2/3 complex-mediated actin nucleation	0.00129
		aspartate biosynthetic process	0.047
		aspartate family amino acid catabolic process	0.0123
		aspartate family amino acid metabolic process	0.0183
		asymmetric protein localization	0.0293
		ATF6-mediated unfolded protein response	0.0413
		ATP biosynthetic process	3.16e-07
		ATP generation from ADP	0.000452
		ATP metabolic process	4.9e-23
		ATP synthesis coupled electron transport	9.58e-12
		ATP synthesis coupled proton transport	1.16e-06
		autophagy	0.00615
		axon development	6.06e-06
		axon guidance	2.73e-05
		axonogenesis	9.51e-06
		B cell receptor signaling pathway	0.024
		barbed-end actin filament capping	0.00284
		beta-amyloid clearance	0.0413
		binding of sperm to zona pellucida	0.0397
		biological adhesion	0.00106
		biological regulation	1.05e-06
		biological_process	2.89e-42
		bioluminescence	5.4e-06
		biosynthetic process	8.88e-21
		blood coagulation	1.32e-12
		blood coagulation, fibrin clot formation	2.25e-06
		blood coagulation, intrinsic pathway	3.76e-05
		blood vessel endothelial cell migration	0.046
		branched-chain amino acid catabolic process	1.33e-08
		branched-chain amino acid metabolic process	6.01e-08
		canonical glycolysis	9.57e-06
		canonical Wnt signaling pathway	0.0113
		cap-independent translational initiation	0.00727
		carbohydrate biosynthetic process	5.56e-12
		carbohydrate catabolic process	1.58e-08
		carbohydrate derivative biosynthetic process	1.9e-09
		carbohydrate derivative catabolic process	0.000227
		carbohydrate derivative metabolic process	3.6e-23
		carbohydrate metabolic process	3.1e-19
		carboxylic acid biosynthetic process	0.000156
		carboxylic acid catabolic process	2.78e-15
		carboxylic acid metabolic process	8.34e-63
		cardiac muscle cell action potential	0.0213
		cardiac muscle contraction	0.0113
		cardiovascular system development	0.047
		catabolic process	2.04e-58
		catecholamine metabolic process	0.0199
		catechol-containing compound metabolic process	0.0199
		cation homeostasis	0.0117
		cell activation	3.34e-05
		cell adhesion	0.00235
		cell adhesion molecule production	0.0275
		cell aging	0.0138
		cell cycle arrest	0.000984
		cell cycle checkpoint	0.0211
		cell cycle G1/S phase transition	0.00399
		cell cycle G2/M phase transition	0.0445
		cell cycle phase transition	0.00122
		cell cycle process	0.0395
		cell death	4.54e-11
		cell death in response to oxidative stress	0.000542
		cell development	5.73e-05
		cell differentiation	8.37e-05
		cell junction assembly	1.42e-06
		cell junction organization	1.11e-05
		cell migration	0.00215
		cell morphogenesis	1.23e-05
		cell morphogenesis involved in differentiation	1.02e-06
		cell morphogenesis involved in neuron differentiation	4.08e-05
		cell motility	0.00449
		cell part morphogenesis	0.000159
		cell projection morphogenesis	0.000301
		cell projection organization	0.000248
		cell recognition	0.00969
		cell redox homeostasis	2.26e-07
		cell-cell junction assembly	0.000534
		cell-cell junction organization	0.000646
		cell-matrix adhesion	0.00837
		cell-substrate adhesion	0.000231
		cell-substrate junction assembly	0.014
		cellular aldehyde metabolic process	3.02e-16
		cellular amide metabolic process	1.17e-41
		cellular amine metabolic process	2.37e-10
		cellular amino acid catabolic process	2.99e-10
		cellular amino acid metabolic process	1.92e-47
		cellular aromatic compound metabolic process	9.91e-10
		cellular biogenic amine metabolic process	8.17e-09
		cellular biosynthetic process	3.01e-16
		cellular carbohydrate biosynthetic process	0.000233
		cellular carbohydrate catabolic process	0.022
		cellular carbohydrate metabolic process	0.00748
		cellular catabolic process	2.47e-50
		cellular cation homeostasis	0.0087
		cellular chemical homeostasis	0.0106
		cellular component assembly	1.01e-19
		cellular component biogenesis	8.98e-28
		cellular component disassembly	2.44e-39
		cellular component disassembly involved in execution phase of apoptosis	7.94e-06
		cellular component morphogenesis	3.31e-06
		cellular component organization	4.6e-39
		cellular component organization or biogenesis	6.97e-39
		cellular detoxification	6.42e-21
		cellular detoxification of nitrogen compound	0.047
		cellular developmental process	0.000158
		cellular glucan metabolic process	0.0186
		cellular heat acclimation	0.0316
		cellular homeostasis	3.63e-05
		cellular hormone metabolic process	0.0217
		cellular ion homeostasis	0.00365
		cellular iron ion homeostasis	0.0219
		cellular ketone body metabolic process	0.00599
		cellular ketone metabolic process	1.58e-11
		cellular lipid catabolic process	1.57e-09
		cellular lipid metabolic process	6.65e-07
		cellular localization	3.16e-26
		cellular macromolecular complex assembly	2.83e-18
		cellular macromolecule biosynthetic process	1.99e-05
		cellular macromolecule catabolic process	2.6e-21
		cellular macromolecule localization	5.57e-24
		cellular macromolecule metabolic process	4.38e-09
		cellular metabolic process	6.07e-41
		cellular metal ion homeostasis	0.0142
		cellular modified amino acid metabolic process	2.61e-34
		cellular nitrogen compound biosynthetic process	9e-05
		cellular nitrogen compound catabolic process	1.15e-21
		cellular nitrogen compound metabolic process	2.29e-25
		cellular oxidant detoxification	1.41e-19
		cellular polysaccharide biosynthetic process	0.0285
		cellular polysaccharide catabolic process	0.00447
		cellular polysaccharide metabolic process	0.0223
		cellular process	1.35e-39
		cellular protein catabolic process	9.95e-05
		cellular protein complex assembly	3.11e-08
		cellular protein complex disassembly	7.26e-26
		cellular protein localization	2.64e-24
		cellular protein metabolic process	2.39e-21
		cellular respiration	8.83e-26
		cellular response to alcohol	0.0395
		cellular response to amino acid stimulus	0.0273
		cellular response to chemical stimulus	5.33e-16
		cellular response to cytokine stimulus	0.00675
		cellular response to DNA damage stimulus	0.0112
		cellular response to endogenous stimulus	6.91e-06
		cellular response to fibroblast growth factor stimulus	5.2e-05
		cellular response to growth factor stimulus	0.000141
		cellular response to heat	0.00633
		cellular response to hormone stimulus	0.000313
		cellular response to indole-3-methanol	0.0044
		cellular response to inorganic substance	0.00195
		cellular response to insulin stimulus	5.73e-05
		cellular response to lipoprotein particle stimulus	0.0136
		cellular response to low-density lipoprotein particle stimulus	0.00727
		cellular response to metal ion	0.0107
		cellular response to nitrogen compound	3.31e-05
		cellular response to organic substance	3.66e-07
		cellular response to organonitrogen compound	0.000134
		cellular response to oxidative stress	2.11e-07
		cellular response to oxygen radical	7.13e-07
		cellular response to oxygen-containing compound	6.84e-07
		cellular response to peptide	7.21e-05
		cellular response to peptide hormone stimulus	4.11e-05
		cellular response to reactive oxygen species	1.21e-05
		cellular response to stimulus	5.42e-06
		cellular response to stress	2.69e-11
		cellular response to superoxide	7.13e-07
		cellular response to topologically incorrect protein	0.000952
		cellular response to tumor necrosis factor	6.43e-05
		cellular response to unfolded protein	0.000372
		cellular response to xenobiotic stimulus	1.49e-05
		cellular response to X-ray	0.036
		cellular transition metal ion homeostasis	0.0138
		chaperone mediated protein folding requiring cofactor	0.036
		chaperone-mediated autophagy	0.00495
		chaperone-mediated protein complex assembly	0.00352
		chaperone-mediated protein folding	2.17e-06
		chemical homeostasis	0.0026
		chemotaxis	1.3e-06
		cholesterol biosynthetic process	0.0143
		cholesterol efflux	0.00958
		cholesterol esterification	0.000617
		cholesterol import	0.0146
		cholesterol transport	0.0183
		chondroitin sulfate catabolic process	0.031
		chromatin assembly	0.023
		chromatin assembly or disassembly	0.0442
		circulatory system development	0.047
		cis assembly of pre-catalytic spliceosome	0.0316
		citrate metabolic process	1.82e-12
		citrulline metabolic process	0.0316
		coagulation	2.23e-12
		coenzyme biosynthetic process	0.000747
		coenzyme metabolic process	2.66e-14
		cofactor biosynthetic process	2.56e-05
		cofactor metabolic process	2.58e-18
		collagen catabolic process	8.11e-06
		collagen fibril organization	8.66e-05
		collagen metabolic process	1.2e-05
		complement activation	9.26e-07
		complement activation, alternative pathway	0.0275
		complement activation, classical pathway	0.00352
		COPI coating of Golgi vesicle	4.97e-05
		COPI-coated vesicle budding	4.97e-05
		COPII vesicle coating	0.00306
		COPII-coated vesicle budding	0.000586
		copper ion transport	0.00752
		cortical actin cytoskeleton organization	0.0194
		cortical cytoskeleton organization	0.0159
		cotranslational protein targeting to membrane	4.18e-42
		CRD-mediated mRNA stabilization	0.034
		cuticle development	0.0316
		cytokine-mediated signaling pathway	0.0335
		cytoplasmic translation	4.95e-07
		cytoplasmic translational initiation	0.0175
		cytoskeletal anchoring at plasma membrane	0.0101
		cytoskeleton organization	4.79e-10
		'de novo' posttranslational protein folding	1.1e-08
		'de novo' protein folding	7.77e-10
		defense response	3.75e-07
		defense response to bacterium	0.0339
		dermatan sulfate biosynthetic process	0.0316
		dermatan sulfate metabolic process	0.0412
		detoxification	2.8e-20
		developmental process	2.03e-10
		diadenosine polyphosphate biosynthetic process	0.0183
		diadenosine polyphosphate metabolic process	0.0316
		diadenosine tetraphosphate biosynthetic process	0.0183
		diadenosine tetraphosphate metabolic process	0.0183
		dicarboxylic acid metabolic process	4.24e-05
		diphosphate metabolic process	0.047
		disaccharide biosynthetic process	0.0316
		disaccharide metabolic process	0.0275
		diterpenoid metabolic process	4.26e-07
		DNA conformation change	0.000157
		DNA damage checkpoint	0.000413
		DNA damage response, signal transduction by p53 class mediator	1.71e-05
		DNA damage response, signal transduction by p53 class mediator resulting in cell cycle arrest	1.78e-08
		DNA duplex unwinding	0.00108
		DNA geometric change	0.000183
		DNA integrity checkpoint	0.000205
		DNA ligation	0.0244
		DNA ligation involved in DNA repair	0.00495
		DNA metabolic process	0.011
		DNA packaging	0.014
		DNA replication	0.0026
		DNA-templated transcription, termination	0.000593
		dopamine catabolic process	0.0124
		dopamine metabolic process	0.0117
		double-strand break repair via classical nonhomologous end joining	0.047
		elastic fiber assembly	0.00763
		electron transport chain	8.61e-19
		endocytosis	3.97e-13
		endoderm development	0.0219
		endoderm formation	0.0143
		endodermal cell differentiation	0.00484
		endomembrane system organization	2.89e-05
		endonucleolytic cleavage to generate mature 3'-end of SSU-rRNA from (SSU-rRNA, 5.8S rRNA, LSU-rRNA)	0.00771
		endoplasmic reticulum organization	0.0221
		endoplasmic reticulum unfolded protein response	0.000218
		endothelial cell development	0.019
		endothelial cell migration	0.0483
		energy coupled proton transport, down electrochemical gradient	1.16e-06
		energy derivation by oxidation of organic compounds	8.9e-25
		energy reserve metabolic process	0.00402
		entry into cell of other organism involved in symbiotic interaction	0.0195
		entry into host	0.0195
		entry into host cell	0.0195
		entry into other organism involved in symbiotic interaction	0.0195
		enzyme linked receptor protein signaling pathway	0.000462
		ephrin receptor signaling pathway	0.00452
		epidermal growth factor receptor signaling pathway	0.00431
		epithelial cell differentiation	0.0316
		epithelium development	7.78e-06
		ER to Golgi vesicle-mediated transport	2.72e-11
		ERAD pathway	0.0325
		ER-associated ubiquitin-dependent protein catabolic process	0.00286
		ERBB signaling pathway	0.00105
		ER-nucleus signaling pathway	0.047
		erythrose 4-phosphate/phosphoenolpyruvate family amino acid metabolic process	0.0235
		establishment of apical/basal cell polarity	0.0316
		establishment of cell polarity	0.0483
		establishment of endothelial intestinal barrier	0.031
		establishment of Golgi localization	0.00052
		establishment of integrated proviral latency	0.00144
		establishment of localization	1.06e-36
		establishment of localization in cell	6.53e-25
		establishment of lymphocyte polarity	0.0488
		establishment of monopolar cell polarity	0.0118
		establishment of organelle localization	0.00151
		establishment of planar polarity	1.22e-12
		establishment of protein localization	1.42e-18
		establishment of protein localization to chromatin	0.0217
		establishment of protein localization to chromosome	0.000182
		establishment of protein localization to endoplasmic reticulum	7.86e-43
		establishment of protein localization to membrane	1.36e-24
		establishment of protein localization to organelle	2.98e-19
		establishment of protein localization to plasma membrane	0.0149
		establishment of protein localization to telomere	0.00418
		establishment of RNA localization	3.53e-05
		establishment of T cell polarity	0.034
		establishment of tissue polarity	3.64e-12
		establishment of vesicle localization	0.0383
		establishment of viral latency	0.00727
		establishment or maintenance of cell polarity	0.0123
		establishment or maintenance of monopolar cell polarity	0.0136
		ethanol metabolic process	0.000117
		ethanol oxidation	4.38e-05
		eukaryotic translation initiation factor 4F complex assembly	0.00771
		execution phase of apoptosis	0.000662
		exocytosis	1.97e-10
		extracellular fibril organization	3.44e-06
		extracellular matrix disassembly	4.09e-14
		extracellular matrix organization	2.73e-23
		extracellular structure organization	3.52e-23
		fat-soluble vitamin metabolic process	0.000159
		fatty acid beta-oxidation	1.78e-06
		fatty acid beta-oxidation using acyl-CoA dehydrogenase	0.00357
		fatty acid catabolic process	2.09e-05
		fatty acid metabolic process	3.01e-05
		fatty acid oxidation	2.17e-05
		Fc receptor mediated stimulatory signaling pathway	0.000366
		Fc receptor signaling pathway	1.59e-05
		Fc-epsilon receptor signaling pathway	0.00856
		Fc-gamma receptor signaling pathway	0.000253
		Fc-gamma receptor signaling pathway involved in phagocytosis	0.000206
		fibril organization	9.16e-10
		fibrinolysis	3.7e-06
		fibroblast growth factor receptor signaling pathway	0.000128
		fibroblast proliferation	0.0273
		formaldehyde catabolic process	0.00771
		formaldehyde metabolic process	0.00312
		formation of translation preinitiation complex	0.00164
		fructose 6-phosphate metabolic process	0.0488
		fructose biosynthetic process	0.0183
		fructose metabolic process	0.00299
		fumarate metabolic process	0.00548
		G1 DNA damage checkpoint	3.24e-07
		G1/S transition of mitotic cell cycle	0.00407
		galactose catabolic process	0.00963
		galactose metabolic process	0.034
		gamma-aminobutyric acid catabolic process	0.0183
		gamma-aminobutyric acid metabolic process	0.0168
		gas transport	0.00853
		gene expression	7.97e-09
		generation of neurons	0.00462
		generation of precursor metabolites and energy	5.89e-29
		glial cell migration	0.0187
		glucan biosynthetic process	0.0221
		glucan catabolic process	0.00447
		glucan metabolic process	0.0186
		gluconeogenesis	1.07e-06
		glucose 1-phosphate metabolic process	0.047
		glucose 6-phosphate metabolic process	4.05e-05
		glucose catabolic process	4.57e-05
		glucose catabolic process to pyruvate	9.57e-06
		glucose metabolic process	7.17e-10
		glucuronate catabolic process	0.0168
		glucuronate catabolic process to xylulose 5-phosphate	0.0124
		glutamate catabolic process	0.0488
		glutamate catabolic process to 2-oxoglutarate	0.047
		glutamate catabolic process to aspartate	0.0316
		glutamine family amino acid catabolic process	0.0164
		glutamine family amino acid metabolic process	0.047
		glutathione derivative biosynthetic process	8e-06
		glutathione derivative metabolic process	8e-06
		glutathione metabolic process	6.83e-07
		glyceraldehyde-3-phosphate biosynthetic process	0.047
		glyceraldehyde-3-phosphate metabolic process	3.12e-06
		glycerol-3-phosphate catabolic process	0.0488
		glycerol-3-phosphate metabolic process	0.0467
		glycerolipid catabolic process	0.00215
		glycogen biosynthetic process	0.0221
		glycogen catabolic process	0.00404
		glycogen metabolic process	0.0181
		glycolytic process	0.00034
		glycolytic process through fructose-6-phosphate	1.15e-05
		glycolytic process through glucose-6-phosphate	1.15e-05
		glycoprotein biosynthetic process	9.07e-06
		glycoprotein metabolic process	5.78e-06
		glycosaminoglycan biosynthetic process	0.0355
		glycosaminoglycan catabolic process	0.000156
		glycosaminoglycan metabolic process	0.00837
		glycosyl compound biosynthetic process	1.8e-05
		glycosyl compound metabolic process	1.71e-22
		glycosylation	4.59e-06
		glyoxylate cycle	0.0183
		glyoxylate metabolic process	3.77e-07
		Golgi localization	0.00727
		Golgi organization	0.0013
		Golgi transport vesicle coating	4.97e-05
		Golgi vesicle budding	0.000313
		Golgi vesicle transport	1.07e-11
		heat acclimation	0.047
		heme metabolic process	0.00976
		hemostasis	4.49e-13
		hepaticobiliary system development	0.0484
		heterocycle catabolic process	1.47e-21
		heterocycle metabolic process	5.04e-09
		heterotypic cell-cell adhesion	0.0174
		hexitol metabolic process	0.047
		hexose biosynthetic process	1.17e-07
		hexose catabolic process	7.76e-07
		hexose metabolic process	1.85e-10
		high-density lipoprotein particle assembly	0.00319
		high-density lipoprotein particle clearance	0.0488
		high-density lipoprotein particle remodeling	0.0175
		histone mRNA metabolic process	0.0203
		homeostatic process	4.81e-08
		hormone metabolic process	0.000147
		humoral immune response	0.00418
		humoral immune response mediated by circulating immunoglobulin	0.00733
		hyaluronan metabolic process	0.0143
		hydrogen ion transmembrane transport	1.79e-09
		hydrogen peroxide biosynthetic process	0.0235
		hydrogen peroxide catabolic process	2.45e-12
		hydrogen peroxide metabolic process	1.47e-10
		hydrogen transport	4.79e-08
		immune effector process	0.00145
		immune response	0.000332
		immune response-activating cell surface receptor signaling pathway	1.7e-08
		immune response-activating signal transduction	2.57e-07
		immune response-regulating cell surface receptor signaling pathway	7.42e-05
		immune response-regulating cell surface receptor signaling pathway involved in phagocytosis	0.000206
		immune response-regulating signaling pathway	6.79e-05
		immune system process	2.07e-07
		immunoglobulin mediated immune response	0.0389
		inclusion body assembly	0.0244
		inflammatory response	0.0377
		innate immune response	5.28e-06
		innate immune response activating cell surface receptor signaling pathway	2.34e-07
		innate immune response-activating signal transduction	5.48e-05
		inner mitochondrial membrane organization	0.0123
		inorganic ion homeostasis	0.00507
		insulin receptor signaling pathway	0.000698
		interaction with host	0.00717
		interaction with symbiont	0.00181
		intermediate filament cytoskeleton organization	0.000422
		intermediate filament organization	0.00115
		intermediate filament-based process	0.00047
		interspecies interaction between organisms	2.19e-33
		intestinal absorption	0.00976
		intestinal cholesterol absorption	0.0467
		intestinal lipid absorption	0.0467
		intracellular copper ion transport	0.00312
		intracellular protein transport	1.59e-21
		intracellular sequestering of iron ion	0.0316
		intracellular signal transduction	0.0107
		intracellular signal transduction involved in G1 DNA damage checkpoint	5.3e-09
		intracellular transport	8.52e-29
		intrinsic apoptotic signaling pathway	6.06e-05
		intrinsic apoptotic signaling pathway in response to oxidative stress	0.00113
		ion homeostasis	0.00742
		IRE1-mediated unfolded protein response	0.000575
		IRES-dependent translational initiation	0.00195
		IRES-dependent viral translational initiation	1.46e-05
		iron ion homeostasis	0.0208
		isocitrate metabolic process	0.0168
		isoprenoid metabolic process	3.95e-05
		keratan sulfate biosynthetic process	0.0455
		keratan sulfate catabolic process	8.07e-07
		keratan sulfate metabolic process	0.00316
		ketone body biosynthetic process	0.0202
		ketone body catabolic process	0.00548
		ketone body metabolic process	0.00727
		lactose biosynthetic process	0.0316
		lactose metabolic process	0.0316
		lamellipodium organization	0.0351
		L-ascorbic acid metabolic process	0.0316
		leucine catabolic process	0.00139
		leucine metabolic process	0.000218
		leukocyte migration	0.0324
		leukocyte migration involved in inflammatory response	0.0488
		L-glutamate transport	0.0168
		lipid biosynthetic process	0.0382
		lipid catabolic process	8.4e-06
		lipid homeostasis	0.0196
		lipid localization	0.00919
		lipid metabolic process	5.11e-07
		lipid modification	0.00183
		lipid oxidation	2.55e-05
		lipid transport	0.0251
		liver development	0.0429
		localization	1.45e-33
		localization of cell	0.00449
		localization within membrane	0.00501
		locomotion	2.16e-07
		low-density lipoprotein particle clearance	0.0458
		low-density lipoprotein receptor particle metabolic process	0.00853
		L-phenylalanine metabolic process	0.0235
		lysine catabolic process	0.0467
		macroautophagy	0.00458
		macromitophagy	0.00968
		macromolecular complex assembly	1.57e-27
		macromolecular complex disassembly	2.84e-25
		macromolecular complex remodeling	0.0155
		macromolecular complex subunit organization	5.58e-29
		macromolecule biosynthetic process	9.52e-07
		macromolecule catabolic process	3.41e-27
		macromolecule glycosylation	3.94e-06
		macromolecule localization	2.28e-24
		macromolecule metabolic process	2.08e-15
		maintenance of location	4.17e-07
		maintenance of location in cell	1.04e-05
		maintenance of protein location	0.000451
		maintenance of protein location in cell	0.00123
		malate metabolic process	0.0235
		mammary gland involution	0.0275
		MAPK cascade	0.00419
		meiotic spindle organization	0.00583
		membrane assembly	0.0169
		membrane biogenesis	0.0255
		membrane budding	6.78e-06
		membrane invagination	4.7e-05
		membrane organization	1.73e-28
		membrane raft assembly	0.000128
		membrane raft organization	0.00312
		membrane repolarization during action potential	0.022
		metabolic process	4.33e-57
		metal ion homeostasis	0.0208
		methylglyoxal metabolic process	0.0488
		microtubule depolymerization	0.0334
		microtubule polymerization or depolymerization	0.0114
		microtubule-based process	0.0115
		midbrain development	0.000238
		mitochondrial acetyl-CoA biosynthetic process from pyruvate	0.00963
		mitochondrial ATP synthesis coupled electron transport	6.6e-12
		mitochondrial ATP synthesis coupled proton transport	1.1e-08
		mitochondrial electron transport, cytochrome c to oxygen	5.24e-06
		mitochondrial electron transport, NADH to ubiquinone	5.2e-05
		mitochondrial electron transport, ubiquinol to cytochrome c	1.36e-06
		mitochondrial membrane organization	0.000103
		mitochondrial outer membrane permeabilization	0.0259
		mitochondrial outer membrane permeabilization involved in programmed cell death	0.0359
		mitochondrial respiratory chain complex assembly	0.0229
		mitochondrial respiratory chain complex I assembly	0.0319
		mitochondrial respiratory chain complex I biogenesis	0.0319
		mitochondrial RNA catabolic process	0.047
		mitochondrial transmembrane transport	1.64e-06
		mitochondrial transport	5.99e-05
		mitochondrion organization	2.3e-05
		mitophagy in response to mitochondrial depolarization	0.00936
		mitotic cell cycle	0.011
		mitotic cell cycle checkpoint	0.00358
		mitotic cell cycle phase transition	0.00117
		mitotic cell cycle process	0.00365
		mitotic DNA damage checkpoint	4.8e-06
		mitotic DNA integrity checkpoint	4.47e-06
		mitotic G1 DNA damage checkpoint	2.27e-07
		mitotic G1/S transition checkpoint	2.27e-07
		mitotic nuclear envelope reassembly	0.00324
		mitotic spindle organization	0.0438
		modification by host of symbiont morphology or physiology	0.00431
		modification of morphology or physiology of other organism	0.047
		modification of morphology or physiology of other organism involved in symbiotic interaction	0.0219
		modification-dependent macromolecule catabolic process	0.0316
		modification-dependent protein catabolic process	0.0253
		modulation by host of viral genome replication	0.0235
		modulation by host of viral process	0.000137
		monocarboxylic acid biosynthetic process	0.00418
		monocarboxylic acid catabolic process	1.3e-07
		monocarboxylic acid metabolic process	5.06e-17
		monosaccharide biosynthetic process	7.11e-11
		monosaccharide catabolic process	1.47e-08
		monosaccharide metabolic process	2.65e-11
		morphogenesis of a polarized epithelium	2.33e-14
		morphogenesis of an epithelium	5.19e-05
		movement in environment of other organism involved in symbiotic interaction	0.0195
		movement in host environment	0.0195
		movement of cell or subcellular component	4.19e-10
		mRNA 3'-end processing	0.000551
		mRNA catabolic process	1.52e-24
		mRNA export from nucleus	0.00553
		mRNA metabolic process	5.55e-33
		mRNA processing	3.87e-12
		mRNA splice site selection	0.00316
		mRNA splicing, via spliceosome	1.07e-18
		mRNA stabilization	0.0194
		mRNA transport	0.00025
		mRNA-containing ribonucleoprotein complex export from nucleus	0.00553
		mucopolysaccharide metabolic process	0.00077
		multicellular organism catabolic process	1.8e-06
		multicellular organism development	5.65e-06
		multicellular organism metabolic process	2.51e-05
		multicellular organismal macromolecule metabolic process	9.53e-06
		multicellular organismal process	2.6e-09
		multi-organism cellular process	4.36e-32
		multi-organism localization	0.0337
		multi-organism metabolic process	8.66e-22
		multi-organism process	6.67e-18
		multi-organism transport	0.0337
		muscle contraction	3.45e-06
		muscle filament sliding	0.00497
		muscle system process	5.05e-06
		NAD metabolic process	9.49e-09
		NADH dehydrogenase complex assembly	0.0319
		NADH metabolic process	2e-09
		NADH regeneration	9.57e-06
		NADP metabolic process	4.58e-07
		NADPH regeneration	0.00138
		ncRNA metabolic process	2.67e-13
		ncRNA processing	3.03e-11
		negative regulation by host of viral process	0.0202
		negative regulation of actin filament depolymerization	3.88e-05
		negative regulation of actin filament polymerization	7.81e-06
		negative regulation of apoptotic process	9.81e-10
		negative regulation of apoptotic signaling pathway	0.00125
		negative regulation of biological process	1.64e-10
		negative regulation of blood coagulation	3.64e-07
		negative regulation of calcium ion transport into cytosol	0.0376
		negative regulation of calcium-mediated signaling	0.0413
		negative regulation of canonical Wnt signaling pathway	0.000362
		negative regulation of catalytic activity	6.72e-13
		negative regulation of catecholamine metabolic process	0.047
		negative regulation of cation channel activity	0.0221
		negative regulation of cell communication	0.0039
		negative regulation of cell cycle G1/S phase transition	1.09e-05
		negative regulation of cell cycle phase transition	0.00449
		negative regulation of cell cycle process	0.0234
		negative regulation of cell death	4.19e-11
		negative regulation of cell-cell adhesion mediated by cadherin	0.047
		negative regulation of cellular amide metabolic process	0.000156
		negative regulation of cellular amine metabolic process	0.0413
		negative regulation of cellular component organization	1.11e-06
		negative regulation of cellular metabolic process	2.51e-05
		negative regulation of cellular process	2.88e-10
		negative regulation of cellular protein metabolic process	1.65e-10
		negative regulation of cellular response to oxidative stress	0.00213
		negative regulation of cholesterol biosynthetic process	0.0124
		negative regulation of cholesterol metabolic process	0.0124
		negative regulation of coagulation	4.95e-07
		negative regulation of complement activation, lectin pathway	0.0316
		negative regulation of cytoskeleton organization	5.03e-07
		negative regulation of dopamine metabolic process	0.047
		negative regulation of endocytosis	0.00347
		negative regulation of endopeptidase activity	1.11e-06
		negative regulation of endothelial cell chemotaxis	0.0316
		negative regulation of endothelial cell proliferation	0.0221
		negative regulation of extracellular matrix disassembly	0.0316
		negative regulation of extracellular matrix organization	0.0124
		negative regulation of extrinsic apoptotic signaling pathway	0.0202
		negative regulation of fibrinolysis	0.00052
		negative regulation of G1/S transition of mitotic cell cycle	8e-06
		negative regulation of hemostasis	3.64e-07
		negative regulation of hyaluronan biosynthetic process	0.047
		negative regulation of hydrogen peroxide-induced cell death	0.0376
		negative regulation of hydrolase activity	2.38e-06
		negative regulation of intracellular signal transduction	0.047
		negative regulation of intracellular transport	0.0184
		negative regulation of intrinsic apoptotic signaling pathway	0.0169
		negative regulation of ion transmembrane transport	0.0305
		negative regulation of ion transmembrane transporter activity	0.0235
		negative regulation of ion transport	0.0357
		negative regulation of ligase activity	7.95e-09
		negative regulation of lipase activity	0.00103
		negative regulation of lipid transport	0.0203
		negative regulation of macromolecule metabolic process	0.000148
		negative regulation of megakaryocyte differentiation	0.0168
		negative regulation of metabolic process	3.16e-07
		negative regulation of microtubule depolymerization	0.0168
		negative regulation of microtubule polymerization	0.036
		negative regulation of microtubule polymerization or depolymerization	0.00238
		negative regulation of mitochondrial outer membrane permeabilization involved in apoptotic signaling pathway	0.00853
		negative regulation of mitochondrial RNA catabolic process	0.0183
		negative regulation of mitotic cell cycle	0.0258
		negative regulation of mitotic cell cycle phase transition	0.00653
		negative regulation of molecular function	1.85e-11
		negative regulation of mRNA metabolic process	0.00104
		negative regulation of mRNA processing	0.00484
		negative regulation of mRNA splicing, via spliceosome	0.000262
		negative regulation of neuron apoptotic process	0.0495
		negative regulation of neuron death	0.0408
		negative regulation of organelle organization	0.000119
		negative regulation of oxidative stress-induced cell death	0.0058
		negative regulation of oxidative stress-induced intrinsic apoptotic signaling pathway	0.0221
		negative regulation of peptidase activity	3.28e-06
		negative regulation of phosphorylation	0.0413
		negative regulation of programmed cell death	9.35e-10
		negative regulation of protein complex assembly	6.04e-06
		negative regulation of protein complex disassembly	1.57e-05
		negative regulation of protein depolymerization	1.29e-05
		negative regulation of protein metabolic process	2.7e-11
		negative regulation of protein modification by small protein conjugation or removal	2.17e-07
		negative regulation of protein modification process	9.14e-05
		negative regulation of protein polymerization	9.84e-08
		negative regulation of protein ubiquitination	1.8e-07
		negative regulation of proteolysis	0.000809
		negative regulation of release of sequestered calcium ion into cytosol	0.0136
		negative regulation of respiratory burst	0.047
		negative regulation of response to external stimulus	0.0146
		negative regulation of response to oxidative stress	0.00213
		negative regulation of response to reactive oxygen species	0.0138
		negative regulation of response to stimulus	3.09e-05
		negative regulation of response to wounding	0.00162
		negative regulation of RNA catabolic process	0.0217
		negative regulation of RNA splicing	9.15e-06
		negative regulation of ryanodine-sensitive calcium-release channel activity	0.00407
		negative regulation of signal transduction	0.00158
		negative regulation of signaling	0.0044
		negative regulation of telomere maintenance	0.037
		negative regulation of transferase activity	3.99e-06
		negative regulation of translation	0.000469
		negative regulation of transmembrane transport	0.0217
		negative regulation of transport	0.000189
		negative regulation of transporter activity	0.0101
		negative regulation of ubiquitin-protein ligase activity involved in mitotic cell cycle	1.09e-09
		negative regulation of ubiquitin-protein transferase activity	4.68e-09
		negative regulation of very-low-density lipoprotein particle clearance	0.0316
		negative regulation of very-low-density lipoprotein particle remodeling	0.0183
		negative regulation of Wnt signaling pathway	0.00286
		negative regulation of wound healing	2.06e-05
		nervous system development	0.000444
		neural nucleus development	0.000534
		neurogenesis	0.00129
		neuron development	0.000238
		neuron differentiation	0.00316
		neuron projection development	5.13e-05
		neuron projection guidance	2.73e-05
		neuron projection morphogenesis	3.62e-05
		neutral lipid catabolic process	0.000164
		neutral lipid metabolic process	0.000226
		neutrophil aggregation	0.00771
		neutrophil clearance	0.00771
		nicotinamide nucleotide metabolic process	1.48e-13
		NIK/NF-kappaB signaling	1.13e-09
		nitric oxide biosynthetic process	0.0252
		nitric oxide homeostasis	0.047
		nitric oxide metabolic process	0.00564
		nitrogen compound metabolic process	1.26e-29
		nitrogen compound transport	0.042
		non-canonical Wnt signaling pathway	1.55e-12
		nuclear envelope reassembly	0.000639
		nuclear export	0.000159
		nuclear transport	3.01e-06
		nuclear-transcribed mRNA catabolic process	2.86e-24
		nuclear-transcribed mRNA catabolic process, nonsense-mediated decay	3.32e-33
		nucleic acid transport	3.01e-05
		nucleobase metabolic process	0.0195
		nucleobase transport	0.00583
		nucleobase-containing compound catabolic process	4.67e-22
		nucleobase-containing compound metabolic process	1.41e-07
		nucleobase-containing compound transport	0.000318
		nucleobase-containing small molecule interconversion	0.0189
		nucleobase-containing small molecule metabolic process	8.27e-21
		nucleocytoplasmic transport	6.69e-06
		nucleoside biosynthetic process	1.49e-05
		nucleoside diphosphate biosynthetic process	0.0412
		nucleoside diphosphate metabolic process	0.000253
		nucleoside diphosphate phosphorylation	0.000154
		nucleoside metabolic process	1.35e-20
		nucleoside monophosphate biosynthetic process	6.43e-08
		nucleoside monophosphate metabolic process	1.19e-22
		nucleoside phosphate biosynthetic process	0.00545
		nucleoside phosphate metabolic process	2.56e-20
		nucleoside triphosphate biosynthetic process	2.01e-07
		nucleoside triphosphate metabolic process	1.52e-22
		nucleosome assembly	0.0494
		nucleosome organization	0.0246
		nucleotide biosynthetic process	0.0124
		nucleotide metabolic process	9.54e-20
		nucleotide phosphorylation	0.000156
		nucleotide-excision repair, preincision complex stabilization	0.0275
		nucleus organization	0.00402
		opsonization	0.0488
		organ morphogenesis	0.0408
		organelle assembly	0.0181
		organelle localization	0.0135
		organelle organization	9.71e-12
		organic acid biosynthetic process	0.000156
		organic acid catabolic process	2.78e-15
		organic acid metabolic process	6.9e-61
		organic cyclic compound catabolic process	1.52e-22
		organic cyclic compound metabolic process	4.07e-12
		organic hydroxy compound biosynthetic process	0.0241
		organic hydroxy compound catabolic process	0.00659
		organic hydroxy compound metabolic process	3.16e-07
		organic substance biosynthetic process	7.24e-19
		organic substance catabolic process	1.46e-47
		organic substance metabolic process	1.09e-47
		organic substance transport	1.15e-18
		organonitrogen compound biosynthetic process	8.72e-41
		organonitrogen compound catabolic process	1.24e-12
		organonitrogen compound metabolic process	7.31e-84
		organophosphate biosynthetic process	0.00206
		organophosphate catabolic process	0.0217
		organophosphate metabolic process	1.2e-15
		ossification	0.00353
		osteoblast differentiation	6.85e-05
		oxaloacetate metabolic process	0.036
		oxidation-reduction process	1.25e-49
		oxidative phosphorylation	8.84e-13
		oxidoreduction coenzyme metabolic process	8.08e-13
		oxoacid metabolic process	2.1e-61
		oxygen transport	0.0119
		pentose biosynthetic process	0.000465
		pentose metabolic process	0.000801
		pentose-phosphate shunt	3.76e-05
		pentose-phosphate shunt, oxidative branch	0.00312
		peptide biosynthetic process	2.65e-36
		peptide catabolic process	0.0373
		peptide cross-linking	0.00725
		peptide metabolic process	2.27e-45
		peptidyl-amino acid modification	0.0209
		peptidyl-asparagine modification	8.76e-11
		peptidyl-cysteine modification	0.00358
		peptidyl-cysteine oxidation	0.0316
		peptidyl-cysteine S-nitrosylation	0.00352
		peptidyl-cysteine S-trans-nitrosylation	0.0183
		peptidyl-proline modification	0.0179
		phagocytosis	1.34e-10
		phagocytosis, engulfment	2.85e-06
		phagocytosis, recognition	2.24e-05
		phenol-containing compound metabolic process	0.00304
		phosphate-containing compound metabolic process	4.24e-10
		phospholipid efflux	0.00853
		phospholipid transport	0.0372
		phosphorus metabolic process	2.96e-11
		phosphorylation	0.00024
		phototransduction, visible light	0.0231
		pinocytosis	0.0489
		plasma lipoprotein particle assembly	0.00246
		plasma lipoprotein particle clearance	0.000352
		plasma lipoprotein particle remodeling	0.0155
		plasma membrane organization	0.00534
		plasma membrane raft assembly	0.0275
		plasma membrane raft organization	0.0275
		plasminogen activation	0.00418
		platelet activation	1.37e-13
		platelet aggregation	2.58e-05
		platelet degranulation	1.7e-27
		polyamine metabolic process	9.62e-12
		polysaccharide biosynthetic process	0.0144
		polysaccharide catabolic process	0.00814
		polysaccharide metabolic process	0.0161
		porphyrin-containing compound biosynthetic process	0.0189
		porphyrin-containing compound metabolic process	0.00122
		positive regulation by host of viral genome replication	0.00139
		positive regulation by host of viral process	0.000183
		positive regulation of actin filament depolymerization	0.0316
		positive regulation of actin filament polymerization	0.00508
		positive regulation of apoptotic process	0.0142
		positive regulation of apoptotic signaling pathway	0.0135
		positive regulation of ATPase activity	0.00164
		positive regulation of biological process	6.49e-07
		positive regulation of blood coagulation	0.00122
		positive regulation of calcium ion transmembrane transport	0.00469
		positive regulation of calcium ion transmembrane transporter activity	0.00976
		positive regulation of canonical Wnt signaling pathway	3.16e-08
		positive regulation of catabolic process	2.14e-06
		positive regulation of catalytic activity	0.0073
		positive regulation of catecholamine metabolic process	0.000222
		positive regulation of cation channel activity	0.0255
		positive regulation of cation transmembrane transport	0.0107
		positive regulation of cell communication	0.000879
		positive regulation of cell cycle	0.0271
		positive regulation of cell cycle arrest	2.86e-07
		positive regulation of cell cycle process	0.00289
		positive regulation of cell death	0.00499
		positive regulation of cell morphogenesis involved in differentiation	0.00348
		positive regulation of cell-substrate adhesion	1.45e-05
		positive regulation of cellular amide metabolic process	0.000938
		positive regulation of cellular amine metabolic process	0.000782
		positive regulation of cellular catabolic process	1.49e-06
		positive regulation of cellular component biogenesis	0.000443
		positive regulation of cellular component organization	4.09e-08
		positive regulation of cellular metabolic process	0.0168
		positive regulation of cellular process	9.76e-08
		positive regulation of cellular protein catabolic process	3.87e-07
		positive regulation of cellular protein localization	0.0031
		positive regulation of cellular protein metabolic process	0.00229
		positive regulation of cholesterol esterification	3.44e-05
		positive regulation of coagulation	0.00319
		positive regulation of complement activation	0.0316
		positive regulation of cyclic-nucleotide phosphodiesterase activity	0.0316
		positive regulation of cysteine-type endopeptidase activity	0.0195
		positive regulation of cysteine-type endopeptidase activity involved in apoptotic process	0.00986
		positive regulation of cytoplasmic transport	0.047
		positive regulation of cytoskeleton organization	0.00265
		positive regulation of defense response	0.000558
		positive regulation of DNA metabolic process	0.0044
		positive regulation of DNA replication	0.00508
		positive regulation of DNA-templated transcription, initiation	0.037
		positive regulation of dopamine metabolic process	0.000222
		positive regulation of endocytic recycling	0.00548
		positive regulation of endocytosis	0.0213
		positive regulation of endodeoxyribonuclease activity	0.047
		positive regulation of endopeptidase activity	0.00697
		positive regulation of establishment of protein localization	0.0174
		positive regulation of establishment of protein localization to telomere	0.000352
		positive regulation of hemostasis	0.00122
		positive regulation of heterotypic cell-cell adhesion	0.0136
		positive regulation of homeostatic process	0.0122
		positive regulation of hydrolase activity	0.0465
		positive regulation of immune response	3.69e-08
		positive regulation of immune system process	8.7e-06
		positive regulation of inclusion body assembly	0.0124
		positive regulation of innate immune response	0.000137
		positive regulation of intracellular signal transduction	0.00067
		positive regulation of intracellular transport	0.0009
		positive regulation of intrinsic apoptotic signaling pathway	0.0134
		positive regulation of ion transmembrane transport	0.0377
		positive regulation of ion transmembrane transporter activity	0.0167
		positive regulation of ion transport	0.0353
		positive regulation of kinase activity	0.0262
		positive regulation of lamellipodium assembly	0.00484
		positive regulation of lamellipodium organization	0.0164
		positive regulation of ligase activity	1.28e-08
		positive regulation of lipid catabolic process	0.00352
		positive regulation of lipoprotein lipase activity	0.0413
		positive regulation of macromolecule metabolic process	0.0295
		positive regulation of MAPK cascade	0.00771
		positive regulation of metabolic process	0.0402
		positive regulation of mitochondrial membrane permeability	0.019
		positive regulation of mitochondrial membrane permeability involved in apoptotic process	0.0359
		positive regulation of molecular function	0.00353
		positive regulation of mRNA splicing, via spliceosome	0.0413
		positive regulation of neurofibrillary tangle assembly	0.047
		positive regulation of nitric oxide biosynthetic process	0.0272
		positive regulation of nitric oxide metabolic process	0.0272
		positive regulation of nonmotile primary cilium assembly	0.00853
		positive regulation of nuclease activity	0.000956
		positive regulation of organelle assembly	0.0444
		positive regulation of organelle organization	1.56e-05
		positive regulation of peptidase activity	0.00547
		positive regulation of phagocytosis	0.0161
		positive regulation of phosphate metabolic process	0.0489
		positive regulation of phosphorus metabolic process	0.0489
		positive regulation of phosphorylation	0.0322
		positive regulation of podosome assembly	0.0412
		positive regulation of programmed cell death	0.0161
		positive regulation of protein activation cascade	0.0316
		positive regulation of protein catabolic process	1.2e-05
		positive regulation of protein complex assembly	9.16e-05
		positive regulation of protein complex disassembly	0.0269
		positive regulation of protein depolymerization	0.0458
		positive regulation of protein kinase activity	0.0265
		positive regulation of protein localization to Cajal body	2.08e-05
		positive regulation of protein localization to chromosome, telomeric region	8.57e-05
		positive regulation of protein localization to nucleus	0.0113
		positive regulation of protein maturation	0.031
		positive regulation of protein metabolic process	0.00104
		positive regulation of protein modification by small protein conjugation or removal	1.89e-05
		positive regulation of protein phosphorylation	0.0204
		positive regulation of protein polymerization	0.0112
		positive regulation of protein processing	0.0247
		positive regulation of protein processing in phagocytic vesicle	0.047
		positive regulation of protein ubiquitination	1.03e-05
		positive regulation of protein ubiquitination involved in ubiquitin-dependent protein catabolic process	1.05e-07
		positive regulation of proteolysis	1.56e-06
		positive regulation of proteolysis involved in cellular protein catabolic process	5.31e-06
		positive regulation of reactive oxygen species biosynthetic process	0.0234
		positive regulation of reactive oxygen species metabolic process	0.008
		positive regulation of release of sequestered calcium ion into cytosol	0.0306
		positive regulation of respiratory burst	0.0217
		positive regulation of respiratory burst involved in inflammatory response	0.00771
		positive regulation of response to stimulus	2.25e-06
		positive regulation of RNA polymerase II transcriptional preinitiation complex assembly	0.0101
		positive regulation of RNA splicing	0.00814
		positive regulation of sequestering of calcium ion	0.0175
		positive regulation of signal transduction	0.000722
		positive regulation of signaling	0.00076
		positive regulation of sodium ion transmembrane transporter activity	0.034
		positive regulation of steroid metabolic process	0.0151
		positive regulation of stress fiber assembly	0.0399
		positive regulation of substrate adhesion-dependent cell spreading	6.9e-07
		positive regulation of superoxide anion generation	0.0217
		positive regulation of synapse structural plasticity	0.047
		positive regulation of telomerase RNA localization to Cajal body	9.51e-06
		positive regulation of telomere maintenance	0.00717
		positive regulation of telomere maintenance via telomerase	0.00531
		positive regulation of telomere maintenance via telomere lengthening	0.00877
		positive regulation of toll-like receptor signaling pathway	0.0247
		positive regulation of transferase activity	0.0102
		positive regulation of translation	0.00537
		positive regulation of transmembrane transport	0.0181
		positive regulation of transport	0.000381
		positive regulation of transporter activity	0.00664
		positive regulation of triglyceride catabolic process	0.0124
		positive regulation of triglyceride lipase activity	0.0488
		positive regulation of ubiquitin-protein ligase activity involved in regulation of mitotic cell cycle transition	2.31e-09
		positive regulation of ubiquitin-protein transferase activity	4.02e-09
		positive regulation of viral genome replication	0.0344
		positive regulation of viral process	0.0252
		positive regulation of Wnt signaling pathway	1.14e-05
		positive regulation of wound healing	0.00115
		post-Golgi vesicle-mediated transport	0.000301
		posttranscriptional regulation of gene expression	2.31e-20
		post-translational protein modification	5.71e-06
		primary alcohol catabolic process	0.0413
		primary alcohol metabolic process	1.07e-07
		primary metabolic process	7.29e-38
		programmed cell death	3.43e-10
		prolactin secretion	0.0124
		proteasomal protein catabolic process	0.00333
		proteasome-mediated ubiquitin-dependent protein catabolic process	0.00516
		protein activation cascade	2.06e-10
		protein catabolic process	2.1e-05
		protein complex assembly	1.48e-19
		protein complex biogenesis	1.48e-19
		protein complex disassembly	8.85e-26
		protein complex subunit organization	5.32e-39
		protein depolymerization	4.12e-07
		protein export from nucleus	0.0219
		protein folding	3.24e-25
		protein folding in endoplasmic reticulum	0.000471
		protein glycosylation	3.94e-06
		protein heterooligomerization	0.000629
		protein homooligomerization	2.62e-05
		protein homotetramerization	1.23e-05
		protein localization	2.43e-21
		protein localization to Cajal body	3.05e-05
		protein localization to cell periphery	0.0358
		protein localization to chromosome	0.0354
		protein localization to chromosome, telomeric region	0.00284
		protein localization to cytoplasmic stress granule	0.000465
		protein localization to endoplasmic reticulum	6.9e-41
		protein localization to lysosome	0.022
		protein localization to membrane	2.12e-19
		protein localization to membrane raft	0.036
		protein localization to nuclear body	3.05e-05
		protein localization to nucleoplasm	3.05e-05
		protein localization to nucleus	0.0137
		protein localization to organelle	2.56e-20
		protein localization to plasma membrane	0.0335
		protein maturation	1.97e-07
		protein maturation by protein folding	0.0044
		protein metabolic process	8.9e-25
		protein nitrosylation	0.00352
		protein N-linked glycosylation	2.28e-10
		protein N-linked glycosylation via asparagine	8.16e-11
		protein oligomerization	3.09e-08
		protein oxidation	0.000218
		protein peptidyl-prolyl isomerization	0.00814
		protein polymerization	1.38e-05
		protein polyubiquitination	0.00865
		protein processing	2.3e-06
		protein processing in phagocytic vesicle	0.047
		protein refolding	0.00589
		protein stabilization	1.11e-09
		protein targeting	1.55e-16
		protein targeting to ER	4.07e-43
		protein targeting to membrane	1.96e-28
		protein tetramerization	2.33e-06
		protein transport	6.74e-18
		protein ubiquitination involved in ubiquitin-dependent protein catabolic process	0.0112
		protein unfolding	0.0316
		protein-chromophore linkage	0.0275
		protein-DNA complex assembly	0.00976
		protein-DNA complex subunit organization	0.00484
		protein-lipid complex assembly	0.0168
		protein-lipid complex remodeling	0.0155
		proteolysis	6.34e-14
		proteolysis involved in cellular protein catabolic process	0.000722
		proton transport	3.09e-08
		pteridine-containing compound biosynthetic process	0.031
		purine nucleobase metabolic process	0.0272
		purine nucleobase transport	0.00139
		purine nucleoside biosynthetic process	5.65e-06
		purine nucleoside diphosphate biosynthetic process	0.0119
		purine nucleoside diphosphate metabolic process	0.000119
		purine nucleoside metabolic process	8.79e-21
		purine nucleoside monophosphate biosynthetic process	6.97e-09
		purine nucleoside monophosphate metabolic process	3.57e-23
		purine nucleoside triphosphate biosynthetic process	6.49e-06
		purine nucleoside triphosphate metabolic process	6.8e-22
		purine nucleotide biosynthetic process	0.0206
		purine nucleotide metabolic process	1.2e-13
		purine ribonucleoside biosynthetic process	5.65e-06
		purine ribonucleoside diphosphate biosynthetic process	0.0119
		purine ribonucleoside diphosphate metabolic process	0.000119
		purine ribonucleoside metabolic process	1.71e-20
		purine ribonucleoside monophosphate biosynthetic process	6.97e-09
		purine ribonucleoside monophosphate metabolic process	3.24e-23
		purine ribonucleoside triphosphate biosynthetic process	4.09e-06
		purine ribonucleoside triphosphate metabolic process	7.12e-23
		purine ribonucleotide biosynthetic process	0.0152
		purine ribonucleotide metabolic process	6.24e-13
		purine-containing compound biosynthetic process	0.011
		purine-containing compound metabolic process	1.82e-13
		pyridine nucleotide metabolic process	1.48e-13
		pyridine-containing compound metabolic process	1.04e-13
		pyruvate metabolic process	1.25e-06
		Ras protein signal transduction	0.00429
		reactive nitrogen species metabolic process	0.00459
		reactive oxygen species biosynthetic process	0.000491
		reactive oxygen species metabolic process	3.54e-10
		receptor-mediated endocytosis	4.33e-07
		regeneration	0.00639
		regulated exocytosis	1.37e-11
		regulation of acetyl-CoA biosynthetic process from pyruvate	0.0118
		regulation of actin cytoskeleton organization	1.81e-06
		regulation of actin filament depolymerization	1.03e-07
		regulation of actin filament length	5.7e-07
		regulation of actin filament polymerization	1.7e-05
		regulation of actin filament-based process	1.63e-07
		regulation of actin polymerization or depolymerization	4.95e-07
		regulation of activation of membrane attack complex	0.0183
		regulation of acute inflammatory response	0.0406
		regulation of acyl-CoA biosynthetic process	0.00352
		regulation of amyloid precursor protein catabolic process	0.0136
		regulation of anatomical structure morphogenesis	3.64e-07
		regulation of anatomical structure size	8.28e-05
		regulation of angiogenesis	0.0343
		regulation of angiotensin levels in blood	0.036
		regulation of angiotensin metabolic process	0.0412
		regulation of apoptotic cell clearance	0.0119
		regulation of apoptotic process	4.46e-09
		regulation of apoptotic signaling pathway	3.57e-05
		regulation of ATPase activity	0.000999
		regulation of beta-amyloid clearance	0.0275
		regulation of biological process	0.000513
		regulation of biological quality	3.96e-28
		regulation of blood coagulation	3.53e-06
		regulation of body fluid levels	1.51e-10
		regulation of calcium ion transmembrane transporter activity	0.0377
		regulation of canonical Wnt signaling pathway	0.000534
		regulation of cardiac muscle contraction	0.0248
		regulation of catabolic process	8.28e-08
		regulation of catalytic activity	6.16e-07
		regulation of catecholamine metabolic process	0.00484
		regulation of cation channel activity	0.0314
		regulation of Cdc42 protein signal transduction	0.0316
		regulation of cell adhesion	0.0338
		regulation of cell adhesion molecule production	0.0168
		regulation of cell communication	0.00427
		regulation of cell cycle arrest	7.35e-06
		regulation of cell cycle G1/S phase transition	0.000116
		regulation of cell death	1.11e-10
		regulation of cell growth involved in cardiac muscle cell development	0.0488
		regulation of cell migration	0.0387
		regulation of cell morphogenesis	0.0388
		regulation of cell motility	0.0271
		regulation of cell-substrate adhesion	0.002
		regulation of cellular amide metabolic process	7.06e-10
		regulation of cellular amine metabolic process	4.83e-14
		regulation of cellular amino acid metabolic process	4.45e-13
		regulation of cellular catabolic process	3.76e-08
		regulation of cellular component biogenesis	9.29e-06
		regulation of cellular component movement	0.00826
		regulation of cellular component organization	1.56e-11
		regulation of cellular component size	1.78e-05
		regulation of cellular ketone metabolic process	7.01e-10
		regulation of cellular localization	0.00311
		regulation of cellular metabolic process	0.0158
		regulation of cellular process	0.0058
		regulation of cellular protein catabolic process	3.36e-05
		regulation of cellular protein localization	0.00278
		regulation of cellular protein metabolic process	2.57e-09
		regulation of cellular response to heat	0.0377
		regulation of cellular response to oxidative stress	8.96e-05
		regulation of cellular response to stress	0.00017
		regulation of cholesterol biosynthetic process	0.0196
		regulation of cholesterol esterification	0.000128
		regulation of cholesterol import	0.0183
		regulation of cholesterol metabolic process	0.0343
		regulation of coagulation	8.09e-06
		regulation of complement activation	0.00109
		regulation of complement activation, lectin pathway	0.0316
		regulation of cysteine-type endopeptidase activity	0.00319
		regulation of cysteine-type endopeptidase activity involved in apoptotic process	0.00238
		regulation of cytoskeleton organization	2.29e-09
		regulation of defense response	1.45e-05
		regulation of deoxyribonuclease activity	0.0044
		regulation of developmental process	0.00444
		regulation of DNA metabolic process	0.0035
		regulation of DNA replication	0.0158
		regulation of DNA-templated transcription, initiation	0.0349
		regulation of dopamine metabolic process	0.00418
		regulation of endocytosis	0.000188
		regulation of endodeoxyribonuclease activity	0.00319
		regulation of endopeptidase activity	3.97e-09
		regulation of establishment of planar polarity	1.73e-13
		regulation of establishment of protein localization	0.00539
		regulation of establishment of protein localization to chromosome	0.00129
		regulation of establishment of protein localization to telomere	0.000617
		regulation of establishment of T cell polarity	0.047
		regulation of extracellular matrix organization	0.0397
		regulation of extrinsic apoptotic signaling pathway	0.0288
		regulation of fatty acid metabolic process	0.0279
		regulation of fibril organization	0.00312
		regulation of fibrinolysis	0.00255
		regulation of fibroblast proliferation	0.0208
		regulation of G1/S transition of mitotic cell cycle	0.000105
		regulation of generation of precursor metabolites and energy	0.0377
		regulation of hemostasis	3.53e-06
		regulation of heterotypic cell-cell adhesion	0.0083
		regulation of hormone levels	0.00283
		regulation of humoral immune response	0.00617
		regulation of hydrolase activity	1.64e-05
		regulation of immune response	4.73e-05
		regulation of immune system process	5.13e-05
		regulation of inclusion body assembly	0.0247
		regulation of inflammatory response	0.0167
		regulation of innate immune response	0.000804
		regulation of intestinal absorption	0.0275
		regulation of intestinal cholesterol absorption	0.0168
		regulation of intestinal lipid absorption	0.0168
		regulation of intracellular signal transduction	0.00372
		regulation of intracellular transport	0.000505
		regulation of intrinsic apoptotic signaling pathway	0.000138
		regulation of kinase activity	0.0119
		regulation of lamellipodium assembly	0.00238
		regulation of lamellipodium organization	0.00725
		regulation of ligase activity	7.51e-08
		regulation of lipid catabolic process	0.0444
		regulation of lipid metabolic process	0.0128
		regulation of lipoprotein lipase activity	0.00407
		regulation of lipoprotein particle clearance	0.0412
		regulation of localization	2.92e-05
		regulation of locomotion	0.0108
		regulation of macroautophagy	0.047
		regulation of macromolecule metabolic process	0.0236
		regulation of MAP kinase activity	0.00781
		regulation of MAPK cascade	0.00348
		regulation of membrane permeability	0.00121
		regulation of metabolic process	0.00589
		regulation of microtubule cytoskeleton organization	0.00202
		regulation of microtubule depolymerization	0.0199
		regulation of microtubule polymerization or depolymerization	0.00748
		regulation of microtubule-based process	0.00492
		regulation of mitochondrial membrane permeability	0.0106
		regulation of mitochondrial membrane permeability involved in apoptotic process	0.024
		regulation of mitochondrial membrane potential	0.000995
		regulation of mitochondrial outer membrane permeabilization involved in apoptotic signaling pathway	0.0112
		regulation of mitochondrial RNA catabolic process	0.047
		regulation of mitotic spindle assembly	0.0412
		regulation of molecular function	9.8e-06
		regulation of monooxygenase activity	0.00597
		regulation of mRNA metabolic process	0.00085
		regulation of mRNA processing	0.00559
		regulation of mRNA splicing, via spliceosome	0.000218
		regulation of mRNA stability	1.84e-14
		regulation of multicellular organismal process	0.00795
		regulation of multi-organism process	0.0129
		regulation of muscle contraction	0.0118
		regulation of muscle system process	0.022
		regulation of nitric oxide biosynthetic process	0.0391
		regulation of nitric-oxide synthase activity	0.0306
		regulation of nonmotile primary cilium assembly	0.0275
		regulation of nuclease activity	0.000304
		regulation of organ morphogenesis	2.98e-06
		regulation of organelle assembly	0.0246
		regulation of organelle organization	6.59e-09
		regulation of oxidative stress-induced cell death	0.00115
		regulation of oxidative stress-induced intrinsic apoptotic signaling pathway	0.00188
		regulation of oxidoreductase activity	0.0142
		regulation of peptidase activity	5.76e-09
		regulation of phagocytosis	0.00144
		regulation of phosphate metabolic process	0.00373
		regulation of phospholipid catabolic process	0.0413
		regulation of phosphorus metabolic process	0.00126
		regulation of phosphorylation	0.0046
		regulation of plasma lipoprotein particle levels	0.00215
		regulation of podosome assembly	0.034
		regulation of primary metabolic process	0.0153
		regulation of programmed cell death	2.69e-09
		regulation of protein activation cascade	7.54e-05
		regulation of protein catabolic process	7.37e-05
		regulation of protein complex assembly	2.94e-09
		regulation of protein complex disassembly	6.34e-08
		regulation of protein depolymerization	3.73e-07
		regulation of protein kinase activity	0.00589
		regulation of protein localization	0.00112
		regulation of protein localization to Cajal body	2.08e-05
		regulation of protein localization to chromosome, telomeric region	3.76e-05
		regulation of protein localization to nucleus	0.0121
		regulation of protein maturation	0.00622
		regulation of protein metabolic process	9.77e-11
		regulation of protein modification by small protein conjugation or removal	2.74e-05
		regulation of protein modification process	0.0183
		regulation of protein phosphorylation	0.00364
		regulation of protein polymerization	3e-06
		regulation of protein processing	0.00563
		regulation of protein processing in phagocytic vesicle	0.047
		regulation of protein serine/threonine kinase activity	0.0124
		regulation of protein stability	1.63e-08
		regulation of protein transport	0.0285
		regulation of protein ubiquitination	2.47e-05
		regulation of protein ubiquitination involved in ubiquitin-dependent protein catabolic process	1.36e-06
		regulation of proteolysis	1.27e-10
		regulation of proteolysis involved in cellular protein catabolic process	0.000316
		regulation of reactive oxygen species biosynthetic process	0.0118
		regulation of reactive oxygen species metabolic process	0.00594
		regulation of respiratory burst	0.00727
		regulation of respiratory burst involved in inflammatory response	0.047
		regulation of response to external stimulus	0.000309
		regulation of response to oxidative stress	0.000156
		regulation of response to reactive oxygen species	0.00484
		regulation of response to stimulus	5.13e-05
		regulation of response to stress	8.54e-10
		regulation of response to wounding	0.000437
		regulation of RNA polymerase II transcriptional preinitiation complex assembly	0.00652
		regulation of RNA splicing	1.22e-05
		regulation of RNA stability	3.93e-14
		regulation of signal transduction	0.0173
		regulation of signaling	0.0179
		regulation of skeletal muscle contraction by regulation of release of sequestered calcium ion	0.034
		regulation of steroid metabolic process	0.03
		regulation of sterol import	0.0183
		regulation of striated muscle contraction	0.0429
		regulation of substrate adhesion-dependent cell spreading	8e-06
		regulation of sulfur metabolic process	0.00447
		regulation of superoxide metabolic process	0.011
		regulation of symbiosis, encompassing mutualism through parasitism	0.00638
		regulation of T cell mediated immune response to tumor cell	0.0183
		regulation of telomerase RNA localization to Cajal body	9.51e-06
		regulation of telomere maintenance	0.000534
		regulation of telomere maintenance via telomerase	0.003
		regulation of telomere maintenance via telomere lengthening	0.00255
		regulation of transferase activity	0.00367
		regulation of translation	3.74e-09
		regulation of translational elongation	0.00463
		regulation of translational fidelity	0.00495
		regulation of translational initiation	0.000235
		regulation of transport	0.00052
		regulation of transporter activity	0.0371
		regulation of triglyceride catabolic process	0.0413
		regulation of ubiquitin-protein ligase activity involved in mitotic cell cycle	6.12e-09
		regulation of ubiquitin-protein transferase activity	3.81e-08
		regulation of ubiquitin-specific protease activity	0.0316
		regulation of very-low-density lipoprotein particle clearance	0.0316
		regulation of very-low-density lipoprotein particle remodeling	0.047
		regulation of vesicle-mediated transport	0.000313
		regulation of viral process	0.0213
		regulation of Wnt signaling pathway	0.0168
		regulation of wound healing	1.23e-05
		removal of superoxide radicals	2.25e-06
		respiratory burst involved in inflammatory response	0.047
		respiratory electron transport chain	6.52e-20
		response to abiotic stimulus	0.00188
		response to alcohol	0.0023
		response to aluminum ion	0.0044
		response to amino acid	0.0161
		response to axon injury	0.0327
		response to biotic stimulus	0.0136
		response to cadmium ion	0.0272
		response to calcium ion	0.00166
		response to chemical	4.28e-23
		response to cisplatin	0.0275
		response to copper ion	0.000262
		response to corticosteroid	0.0295
		response to cytokine	0.00853
		response to drug	0.00196
		response to endogenous stimulus	2.78e-10
		response to endoplasmic reticulum stress	1.13e-07
		response to estrogen	0.00215
		response to ethanol	0.047
		response to external biotic stimulus	0.0129
		response to external stimulus	1.97e-10
		response to extracellular stimulus	0.00906
		response to fibroblast growth factor	4.03e-05
		response to growth factor	0.000101
		response to heat	0.0158
		response to hormone	8.63e-10
		response to hydrogen peroxide	0.000506
		response to hydroperoxide	0.00853
		response to indole-3-methanol	0.0044
		response to inorganic substance	4.05e-17
		response to insulin	1.99e-05
		response to iron ion	0.0488
		response to iron(II) ion	0.0217
		response to lipid	0.0127
		response to lipid hydroperoxide	0.00138
		response to low-density lipoprotein particle	0.022
		response to mercury ion	0.0489
		response to metal ion	2.67e-09
		response to mitochondrial depolarisation	0.00936
		response to nitrogen compound	2.11e-06
		response to nutrient	0.00906
		response to nutrient levels	0.00471
		response to organic cyclic compound	4.08e-05
		response to organic substance	3.21e-14
		response to organonitrogen compound	5.24e-06
		response to other organism	0.0129
		response to oxidative stress	1.81e-13
		response to oxygen radical	4.74e-07
		response to oxygen-containing compound	2.75e-11
		response to peptide	9.51e-06
		response to peptide hormone	1.36e-06
		response to reactive oxygen species	4.7e-12
		response to selenium ion	0.00583
		response to steroid hormone	0.00278
		response to stimulus	5.37e-16
		response to stress	4.84e-24
		response to superoxide	2.94e-06
		response to temperature stimulus	0.0327
		response to topologically incorrect protein	1.11e-06
		response to toxic substance	1.34e-12
		response to transition metal nanoparticle	3.44e-06
		response to tumor necrosis factor	0.000174
		response to unfolded protein	6.55e-07
		response to wounding	6.53e-12
		response to xenobiotic stimulus	1.03e-05
		retina homeostasis	0.0118
		retinoid metabolic process	5.75e-07
		retinol metabolic process	0.00357
		retrograde vesicle-mediated transport, Golgi to ER	1.58e-08
		reverse cholesterol transport	0.022
		ribonucleoprotein complex assembly	6.5e-11
		ribonucleoprotein complex biogenesis	1.09e-21
		ribonucleoprotein complex export from nucleus	0.000375
		ribonucleoprotein complex localization	0.000506
		ribonucleoprotein complex subunit organization	9.29e-10
		ribonucleoside biosynthetic process	2.84e-05
		ribonucleoside diphosphate biosynthetic process	0.0119
		ribonucleoside diphosphate metabolic process	5.08e-05
		ribonucleoside metabolic process	5.47e-19
		ribonucleoside monophosphate biosynthetic process	2.79e-08
		ribonucleoside monophosphate metabolic process	1.05e-22
		ribonucleoside triphosphate biosynthetic process	1.86e-05
		ribonucleoside triphosphate metabolic process	3.84e-22
		ribonucleotide biosynthetic process	0.0168
		ribonucleotide metabolic process	1.17e-12
		ribose phosphate biosynthetic process	0.0116
		ribose phosphate metabolic process	1.39e-14
		ribosomal large subunit assembly	0.000782
		ribosomal large subunit biogenesis	0.00404
		ribosomal small subunit assembly	0.000617
		ribosomal small subunit biogenesis	6.54e-05
		ribosomal small subunit export from nucleus	0.0316
		ribosome assembly	5.89e-06
		ribosome biogenesis	1.18e-15
		RNA 3'-end processing	0.000399
		RNA catabolic process	6.64e-26
		RNA export from nucleus	0.000534
		RNA localization	2.14e-07
		RNA localization to Cajal body	1.24e-05
		RNA polymerase II transcriptional preinitiation complex assembly	0.047
		RNA processing	5.97e-23
		RNA secondary structure unwinding	0.00667
		RNA splicing	3.42e-17
		RNA splicing, via transesterification reactions	4.11e-19
		RNA splicing, via transesterification reactions with bulged adenosine as nucleophile	1.07e-18
		RNA stabilization	0.0221
		RNA transport	3.01e-05
		RNA-dependent DNA replication	0.00554
		Roundabout signaling pathway	0.0172
		rRNA export from nucleus	0.0316
		rRNA metabolic process	1.02e-16
		rRNA processing	2.31e-17
		rRNA-containing ribonucleoprotein complex export from nucleus	0.00763
		scaRNA localization to Cajal body	0.00548
		secondary alcohol biosynthetic process	0.0143
		secretion	7.22e-07
		secretion by cell	3.31e-06
		selenium compound metabolic process	1.79e-41
		selenocysteine metabolic process	6.45e-39
		sequestering of iron ion	0.0316
		sequestering of metal ion	0.0201
		sequestering of TGFbeta in extracellular matrix	0.0316
		serine family amino acid metabolic process	7.04e-32
		signal peptide processing	0.0458
		signal transduction by p53 class mediator	0.000171
		signal transduction by protein phosphorylation	0.00784
		signal transduction in response to DNA damage	1.34e-05
		signal transduction involved in cell cycle checkpoint	7.31e-09
		signal transduction involved in DNA damage checkpoint	6.6e-09
		signal transduction involved in DNA integrity checkpoint	6.6e-09
		signal transduction involved in mitotic cell cycle checkpoint	2.17e-08
		signal transduction involved in mitotic DNA damage checkpoint	2.17e-08
		signal transduction involved in mitotic DNA integrity checkpoint	2.17e-08
		signal transduction involved in mitotic G1 DNA damage checkpoint	5.3e-09
		single organism cell adhesion	0.0278
		single-multicellular organism process	2.63e-12
		single-organism biosynthetic process	1.36e-17
		single-organism carbohydrate catabolic process	1.18e-08
		single-organism carbohydrate metabolic process	7.01e-16
		single-organism catabolic process	1.52e-37
		single-organism cellular localization	3.31e-14
		single-organism cellular process	3.47e-40
		single-organism developmental process	2.2e-09
		single-organism intracellular transport	1.21e-28
		single-organism localization	4.88e-28
		single-organism membrane budding	1.23e-05
		single-organism membrane organization	1.33e-23
		single-organism metabolic process	3.82e-84
		single-organism organelle organization	3.81e-07
		single-organism process	1.06e-50
		single-organism transport	2.89e-30
		sister chromatid cohesion	0.0486
		small GTPase mediated signal transduction	3.31e-05
		small molecule biosynthetic process	3.34e-12
		small molecule catabolic process	8.57e-24
		small molecule metabolic process	1.32e-78
		sorbitol metabolic process	0.0183
		spindle organization	0.0176
		spliceosomal complex assembly	4.03e-07
		SRP-dependent cotranslational protein targeting to membrane	2.95e-43
		steroid biosynthetic process	0.022
		steroid esterification	0.000617
		steroid metabolic process	0.00798
		sterol biosynthetic process	0.00813
		sterol esterification	0.000617
		sterol import	0.0146
		sterol transport	0.019
		stimulatory C-type lectin receptor signaling pathway	1.86e-07
		striated muscle contraction	0.0334
		substantia nigra development	9.2e-07
		substrate adhesion-dependent cell spreading	5.65e-06
		succinate metabolic process	0.00255
		succinyl-CoA metabolic process	0.00139
		sulfur amino acid metabolic process	0.0483
		sulfur compound biosynthetic process	1.34e-06
		sulfur compound catabolic process	5.17e-05
		sulfur compound metabolic process	1.66e-14
		superoxide metabolic process	0.00024
		symbiosis, encompassing mutualism through parasitism	1.93e-33
		system development	2.16e-07
		T cell mediated immune response to tumor cell	0.0183
		T cell receptor signaling pathway	1.76e-05
		taxis	1.33e-06
		telomerase RNA localization	1.24e-05
		telomerase RNA localization to Cajal body	1.24e-05
		telomere maintenance	3.22e-05
		telomere maintenance via telomerase	0.00922
		telomere maintenance via telomere lengthening	0.00227
		telomere organization	4.17e-05
		termination of RNA polymerase II transcription	1.64e-06
		terpenoid metabolic process	5.65e-06
		tetrahydrobiopterin biosynthetic process	0.034
		tetrahydrobiopterin metabolic process	0.0413
		tetrapyrrole biosynthetic process	0.0239
		tetrapyrrole metabolic process	0.0142
		thioester biosynthetic process	0.00498
		thioester metabolic process	8.68e-05
		thyroid hormone generation	0.00589
		thyroid hormone metabolic process	0.0114
		tissue development	6.97e-09
		tissue homeostasis	0.0247
		tissue morphogenesis	0.000165
		toxin transport	0.0153
		transforming growth factor beta receptor signaling pathway	0.0483
		transition metal ion homeostasis	0.0179
		translation	2.98e-36
		translational elongation	6.39e-25
		translational initiation	4.58e-27
		translational termination	4.84e-24
		transmembrane receptor protein tyrosine kinase signaling pathway	0.000506
		transport	8.49e-38
		tricarboxylic acid cycle	1.01e-13
		tricarboxylic acid metabolic process	1.37e-13
		triglyceride catabolic process	0.000305
		triglyceride metabolic process	0.000506
		triglyceride-rich lipoprotein particle remodeling	0.0044
		tRNA aminoacylation	2.48e-06
		tRNA aminoacylation for protein translation	1.42e-06
		tRNA metabolic process	0.0247
		tubulin complex assembly	0.0217
		tumor necrosis factor-mediated signaling pathway	7.49e-07
		valine catabolic process	0.000841
		valine metabolic process	0.00144
		vascular endothelial growth factor receptor signaling pathway	1.23e-05
		very-low-density lipoprotein particle clearance	0.00853
		very-low-density lipoprotein particle remodeling	0.0044
		vesicle coating	6.87e-05
		vesicle organization	0.00685
		vesicle targeting	0.000107
		vesicle targeting, rough ER to cis-Golgi	0.00306
		vesicle targeting, to, from or within Golgi	3.29e-05
		vesicle-mediated transport	3.24e-25
		viral entry into host cell	0.0144
		viral gene expression	2.36e-22
		viral genome replication	0.0269
		viral latency	0.00752
		viral life cycle	6.03e-23
		viral process	1.06e-31
		viral release from host cell	0.0319
		viral transcription	2.75e-20
		viral translation	0.000218
		vitamin metabolic process	0.000169
		Wnt signaling pathway	0.00583
		Wnt signaling pathway, planar cell polarity pathway	1e-13
		wound healing	1.47e-12
		xenobiotic catabolic process	0.036
		xenobiotic metabolic process	1.07e-05
		xylulose 5-phosphate biosynthetic process	0.0124
		xylulose 5-phosphate metabolic process	0.0124
		xylulose biosynthetic process	0.0183
		xylulose metabolic process	0.00548
		zymogen activation	0.0196
